# Supplementary material for: Analyzing Neck Circumference as an Indicator of CPAP Treatment Response in Obstructive Sleep Apnea with Network Medicine
Source: Diagnostics (Basel). 2021 Jan 7;11(1):86. doi: 10.3390/diagnostics11010086 (PMC7825682; doi:10.3390/diagnostics11010086)
Supplement: Supplementary file 1 [file diagnostics-11-00086-s001.xlsx]

## Sheet: Database D1
ID	Gender	Birth year	Age	Weight (kg)	Height (m)	BMI	Neck (cm)	High Blood Presure	Epworth	Sleepy	AHI_before	AHI_after
2	M	1968	45	85	1.68	30	41	0	14	1	41.5	1.5
3	M	1965	48	140	1.85	40	55	1	20	1	73.9	10
4	M	1960	53	127	1.6	49	52	1	20	1	85.7	11
6	M	1965	48	100	1.75	32	42	0	3	0	83.8	3.1
7	M	1956	57	140	1.84	41	60	1	20	1	74.4	5.9
8	M	1951	62	90	1.65	33	54	1	10	0	75.6	21
9	M	1964	49	145	1.82	43	48	0	5	0	29.3	4
11	M	1959	54	120	1.75	39	43	1	14	1	69.3	6.1
14	M	1940	73	126	1.82	38	52	1	12	1	77	19.3
15	M	1951	62	113	1.7	39	48	0	16	1	56.4	21.2
17	M	1962	51	95	1.72	32	43	1	10	0	65.1	13.1
18	F	1963	50	82	1.65	30	39	1	24	1	32.5	10.4
20	M	1950	63	90	1.69	31	42	1	16	1	42.9	16.9
23	M	1965	48	100	1.84	29	40	0	14	1	48.8	2.2
25	F	1958	55	109	1.7	37	38	1	4	0	34.1	2.3
27	M	1961	52	198	1.96	51	62	1	9	0	1.2	40.8
28	F	1943	70	60	1.58	24	32	1	8	0	16.8	8.7
30	M	1951	62	86	1.67	30	43	1	13	1	51.4	2.6
32	F	1965	48	85	1.56	34	35	1	16	1	20.5	3.9
33	M	1977	36	100	1.78	31	41	1	12	1	74.6	5.3
34	M	1962	51	124	1.75	40	46	1	14	1	49.9	6
35	F	1943	70	100	1.55	41	46	1	20	1	82.4	2.9
36	M	1942	71	126	1.73	42	48	1	8	0	36.5	6.8
37	M	1981	32	90	1.85	26	43	0	6	0	47.9	6
38	M	1951	62	98	1.72	33	45	0	9	0	55.3	1.7
39	M	1957	56	140	1.76	45	48	1	16	1	87.5	19.2
40	M	1956	57	110	1.7	38	48	1	15	1	81.1	12.9
41	M	1983	30	96	1.82	28	44	1	10	0	46.4	12.3
42	M	1967	46	100	1.72	33	42	0	8	0	24	3.7
43	M	1969	44	86	1.72	29	39	1	10	0	35.2	5.8
46	M	1960	53	80	1.8	24	42	0	4	0	37.1	5
47	M	1967	46	153	1.83	45	50	1	12	1	46.3	6.3
48	M	1968	45	100	1.78	31	46	1	17	1	66.7	1
49	M	1987	26	104	1.78	32	43	0	15	1	38.8	7.4
50	M	1968	45	90	1.8	27	41	0	12	1	38.7	5.9
51	F	1958	55	82	1.62	31	40	1	3	0	57.7	30
52	M	1952	61	85	1.75	27	39	1	10	0	31.4	1.2
53	F	1947	66	82	1.6	32	24	1	9	0	22	3.6
54	F	1950	63	100	1.75	32	42	1	20	1	44.6	4.8
56	F	1950	63	80	1.6	31	39	1	16	1	46.3	3.7
60	M	1971	42	69	1.65	25	38	1	2	0	41.1	14.6
62	M	1939	74	82	1.7	28	43	1	11	1	35.7	18.3
64	M	1968	45	135	1.76	43	56	1	11	1	61.2	9.5
67	M	2005	8	35	1.35	19	38	0	4	0	63.4	24.7
68	M	1981	32	110	1.75	35	47	1	4	0	16.3	2.5
69	F	1963	50	83	1.64	30	36	1	9	0	44.2	2.3
70	M	1957	56	97	1.72	32	46	1	14	1	86.7	21
71	M	1966	47	99	1.72	33	44	0	10	0	36.7	13.1
72	M	1948	65	81	1.76	26	44	1	3	0	51.4	4.1
73	M	1960	53	73	1.67	26	42	1	7	0	33.6	10.4
74	F	1968	45	180	1.73	60	45	1	21	1	95.9	4.3
75	F	1973	40	88	1.6	34	35	1	20	1	18.3	0.4
76	M	1958	55	94	1.7	32	43	1	14	1	55.3	2.6
77	M	1951	62	96	1.74	31	43	1	10	0	51	1.6
78	M	1954	59	132	1.76	42	44	1	19	1	63.9	31.2
82	M	1958	55	100	1.75	32	43	1	6	0	44.7	1.5
86	F	1963	50	130	1.6	50	39	1	13	1	119.2	6.4
89	M	1955	58	110	1.78	34	45	1	6	0	91	4
91	M	1960	53	127	1.9	35	43	1	11	1	63.7	49.1
92	F	1969	44	120	1.7	41	37	1	15	1	26.5	3.4
94	M	1953	60	96	1.81	29	42	1	16	1	73.3	10
95	F	1962	51	80	1.5	35	42	0	20	1	45.7	1.3
97	F	1946	67	92	1.58	36	39	1	11	1	42.8	36.6
98	M	1985	28	108	1.79	33	42	0	7	0	16.2	2.1
99	M	1979	34	85	1.7	29	40	0	14	1	83.1	11.7
100	M	1944	69	92	1.76	29	41	1	12	1	29.5	14.3
103	M	1955	58	74	1.78	23	35	1	14	1	55.2	6.5
105	M	1966	47	109	1.83	32	45	0	12	1	76.9	7.9
106	M	1950	63	87	1.75	28	43	1	10	0	30	5.6
108	M	1954	59	126	1.76	40	46	1	10	0	77	62
109	M	1963	50	145	1.78	45	45	1	5	0	83.5	9.2
110	M	1948	65	102	1.78	32	46	1	18	1	75.4	8.6
111	F	1955	58	103	1.5	45	41	1	14	1	36.8	3.8
112	F	1943	70	91	1.72	30	44	1	18	1	42.8	7.7
113	F	1955	58	67	1.49	30	37	0	12	1	69.7	7.6
114	M	1955	58	134	1.76	43	44	1	14	1	76.9	10
115	M	1975	38	115	1.83	34	43	0	3	0	60	9.4
116	F	1953	60	85	1.58	34	36	1	6	0	28.5	0
119	M	1962	54	130	1.82	39	47	1	18	1	93.7	12.8
120	M	1945	68	98	1.67	35	48	1	14	1	22.2	2.9
121	F	1937	76	80	1.6	31	48	0	7	0	19.1	2.2
123	M	1947	66	86	1.82	25	42	1	14	1	60.4	4.8
125	M	1984	29	80	1.73	26	41	0	10	0	51.5	3.4
126	M	1981	32	72	1.62	27	38	0	13	1	93.6	3.3
130	M	1929	84	95	1.7	32	43	1	11	1	50.7	21.8
132	M	1965	48	96	1.84	28	41	0	7	0	22.6	18.7
133	F	1949	64	79	1.64	29	37	1	2	0	40.1	13.1
139	F	1957	56	87	1.64	32	40	0	10	0	30.4	9.7
140	M	1956	57	63	1.73	21	40	0	6	0	26.8	5
142	M	1964	49	120	1.75	39	44	1	14	1	82	4.5
143	M	1955	58	84	1.65	30	43	1	13	1	18.4	1.5
144	F	1949	64	87	1.52	37	40	1	9	0	55.8	4.2
145	M	1960	53	83	1.66	30	40	0	7	0	59.1	2.1
146	M	1947	66	110	1.68	38	45	1	7	0	81.4	61.5
147	M	1959	54	91	1.72	30	45	0	14	1	29	24.2
148	M	1960	53	98	1.72	33	45	1	11	1	58.2	4.9
149	M	1981	32	86	1.87	24	40	0	18	1	51.3	18.6
150	M	1969	44	80	1.7	27	40	0	18	1	42	14.3
152	M	1947	66	122	1.75	39	51	1	12	1	62	7.2
153	M	1953	60	64	1.5	28	43	0	21	1	91.3	77.1
154	F	1956	57	83	1.65	30	40	1	8	0	37.1	1.1
155	M	1952	61	128	1.81	39	50	1	22	1	79.2	24.1
157	M	1976	37	79	1.76	25	41	0	12	1	29.3	4.3
158	M	1964	49	100	1.8	30	47	1	13	1	44.4	3.2
159	M	1961	52	74	1.7	25	39	0	10	0	23.6	1.7
160	M	1975	38	124	1.8	38	46	1	15	1	3.1	24.7
161	M	1961	52	98	1.74	32	45	1	14	1	9.1	20
162	F	1964	48	125	1.7	43	44	1	14	1	69.3	87.2
167	M	1956	57	80	1.58	32	46	1	20	1	62	13.5
170	M	1974	39	105	1.8	32	44	1	22	1	93.5	93.5
171	M	1947	66	83	1.7	28	42	1	18	1	69.2	34.7
172	M	1957	56	120	1.78	37	48	1	14	1	85.1	12.3
173	M	1982	31	120	1.76	38	48	0	9	0	64.4	3.6
174	M	1968	45	165	1.82	49	55	1	20	1	110.7	5.5
175	M	1983	30	78	1.75	25	41	0	10	0	37.6	7.5
176	M	1955	58	80	1.7	27	42	1	12	1	62.9	3.2
177	M	1947	66	108	1.78	34	50	1	14	1	65.4	20.7
179	M	1978	35	135	1.89	37	48	1	2	0	33.6	1.5
180	M	1946	67	120	1.69	42	47	1	14	1	50.7	14.4
181	M	1947	66	86	1.78	27	42	1	8	0	45.6	3.1
182	M	1959	54	85	1.75	27	41	1	7	0	29.6	8.7
183	M	1981	32	96	1.78	30	45	0	11	1	107.4	71.5
185	F	1960	53	84	1.64	31	40	1	14	1	28	1.5
186	M	1981	32	105	1.83	31	43		7	0	27.8	6.5
188	M	1970	43	105	1.71	35	49	0	15	1	76.4	8.5
189	M	1971	42	102	1.86	29	44		3	0	39.5	14.5
190	F	1958	55	93	1.54	39	36	1	8	0	58.2	46.2
193	M	1975	38	92	1.73	30	43	0	16	1	83.7	7.4
194	M	1981	32	99	1.93	26	40	0	10	0	38.7	28.5
197	F	1955	58	82	1.56	33	38	1	4	0	54.5	20.4
202	M	1969	44	90	1.69	31	39	0	8	0	26.3	0.7
204	M	1953	60	125	1.66	45	47	1	16	1	66.7	12.6
205	M	1933	80	82	1.74	27	44	1	10	0	55.1	10.3
208	M	1953	60	140	1.8	43	47	1	20	1	33.4	2.7
209	M	1977	36	94	1.72	31	44	0	14	1	12.7	4.1
210	F	1950	63	56	1.63	21	37	0	10	0	33.6	6.7
212	M	1949	64	110	1.84	32	45	1	11	1	58.2	2.7
213	M	1955	58	91	1.76	29	41	0	10	0	33.9	10.3
218	F	1957	56	80	1.6	31	39	1	14	1	46.2	53.9
220	F	1952	61	88	1.58	35	38	1	4	0	45.7	10.1
221	M	1943	70	90	1.78	28	40	0	8	0	55.9	7.8
222	M	1964	49	94	1.84	27	38	0	6	0	30.4	30.2
224	M	1957	56	86	1.69	30	44	1	13	1	57.9	1.9
226	M	1972	41	98	1.68	34	45	0	15	1	87.7	7.4
228	F	1952	61	75	1.6	29	32	0	12	1	42.5	55

## Sheet: Database D2
ID	Name initials	Date of consultation	Sex	Birthyear	Age	BMI	Neck circumference	High Blood Pressure	AHI	Sleepiness	Epworth SS	MAD (Mean Apnea Duration)	Obstructive MAD	SpO2	Desaturation Index
120	F.T.	2005-10-17	M	1938	67	33	44	0	34.5	1	17	23.4	12.9	82	4.4
124	U.P.	2005-10-20	M	1965	40	42	39	0	3.6	0	6	12.1	11.2	89	6
127	B.S.	2005-10-19	M	1975	29	45	52	1	3.9	0	4	12.1	12.8	89	6.2
128	O.S.	2005-10-24	M	1945	60	31	51	0	31	0	7	26.4	20	88	6.7
129	T.I.	2005-11-01	M	1948	57	41	53	1	75.3	1	17	12.2	13	46	102.8
133	S.G.	2005-11-15	M	1954	51	31	52	1	21.5	0	4	18.1	15.1	86	4
137	S.A.	2006-01-18	M	1960	45	28	46	0	6.9	0	8	16	15.2	93	1
138	M.F.	2006-01-17	M	1978	27	26	41	0	37.4	1	12	23.2	14.5	91	6.4
139	D.I.	2006-01-10	M	1958	47	34	44	0	58.3	1	14	27.2	25.6	68	47.7
140	R.I.	2006-01-05	M	1953	52	30	46	1	44.8	1	11	25	23	83	13.2
144	T.G.	2008-12-06	M	1952	53	34	43	1	29.4	1	11	22.8	20.2	92	5.4
147	C.V.	2006-01-25	M	1935	70	26	47	0	40.6	0	6	21.7	19.1	86	12.8
148	M.M.	2006-01-25	M	1948	57	30	43	1	26.2	1	12	21.1	19	87	3.1
152	M.D.	2006-02-01	M	1957	48	27	43	0	15.5	0	5	25.7	19.3	95	1.3
159	R.H.	2006-02-16	M	1969	37	36	47	0	63.4	1	18	77	28.2	35	67.9
160	A.C.	2006-02-15	M	1950	55	28	45	1	74.5	1	12	22.1	21.8	72	24.4
161	E.I.	2005-09-27	M	1956	49	32	41	0	6.7	0	3	14.4	12.3	90	2.6
164	B.I.	2006-02-27	M	1939	67	28	44	0	19.5	1	10	20.9	18.3	85	3
169	C.S.	2006-02-02	M	1978	27	33	45	0	25	0	1	17.9	12.6	88	3.9
171	T.P.	2005-09-07	M	1982	22	20	34	0	5.3	0	6	20.5	13	89	3.7
172	P.D.	2006-01-12	M	1947	58	44	52	1	96.4	1	23	19.4	19.5	72	58
175	T.P.	2006-05-31	M	1963	42	38	50	0	125.3	0	7	17.7	17.7	62	127.7
177	V.C.	2006-06-07	M	1945	61	35	60	0	69.9	1	10	29.7	30	76	70.6
178	T.I.	2006-05-23	M	1951	55	44	48	1	68.6	1	17	19.4	18.8	73	39.9
180	V.I.	2006-05-17	M	1960	45	30	42	0	76.7	1	14	24	25.3	78	74.4
181	S.P.	2006-06-07	M	1958	47	31	45	0	25	1	16	22.7	16.9	91	1.8
182	M.S.	2006-06-02	M	1957	49	27	43	0	29.3	0	6	24.2	26	86	11.3
183	B.B.	2006-05-16	M	1977	28	33	42	0	21.8	0	9	25.1	17.3	82	3.1
184	B.A.	2006-05-18	M	1947	59	35	45	1	43.2	1	12	23.7	19.3	79	1.9
186	C.P	2006-05-13	M	1980	25	29	40	0	15.5	0	7	19.7	15.7	86	5
188	P.C.	2006-05-24	M	1971	34	29	44	1	21.2	0	7	19.8	12.8	91	19.8
190	M.V.	2006-05-08	M	1957	48	27	45	0	13.4	0	6	18.6	17	88	6.3
191	Z.I.	2006-04-17	M	1947	59	35	44	1	69.9	1	11	25.2	27.2	47	62.9
193	P.G.	2006-04-13	M	1949	57	31	44	1	22.2	0	7	21.6	20.3	86	14.1
195	N.T.	2006-04-25	M	1960	46	28	43	1	75.4	1	13	29.5	30.3	70	72.6
198	J.P.	2006-04-20	M	1945	60	29	44	1	54.1	0	3	35.6	36.7	68	49.4
200	C.I.	2006-04-05	M	1950	55	31	42	0	7.1	0	8	16.2	11.9	93	1
201	U.I.	2006-04-10	M	1949	56	29	44	1	21.9	0	9	19.2	15.6	89	4.2
204	L.I.	2006-05-23	M	1946	60	39	51	1	6.1	1	23	19.4	17.8	76	21
207	T.I.	2006-05-09	M	1949	57	34	54	1	71.5	1	22	26.3	28.2	42	73.4
208	T.G.	2006-05-16	M	1942	63	33	44	1	30.3	1	13	24.9	20.7	80	10.4
210	M.I.	2006-04-04	M	1938	67	39	44	0	21	0	2	27.4	27.6	80	23.2
212	C.C.	2006-04-11	M	1967	38	37	54	1	30.6	0	8	16.4	15.4	85	31.8
213	S.P.	2006-04-05	M	1951	54	33	49	1	77	1	19	20.8	20.6	63	71.8
217	P.V.	2006-03-30	M	1962	43	31	43	1	19.5	1	16	15.9	24.9	38	24.9
218	C.M.	2006-04-14	M	1939	66	26	44	1	20	1	12	10	0	85	94.7
220	M.F.	2006-03-20	M	1954	52	37	51	1	32.9	1	11	21.9	23.9	67	31.1
225	T.G.	2006-03-13	M	1935	71	34	51	1	63.7	1	18	31.5	33.4	69	48.8
230	N.C.	2006-03-22	M	1974	32	50	51	1	40	1	21	17.7	17.6	66	52.6
233	T.V.	2006-03-07	M	1960	45	35	42	1	37.3	1	17	23.9	21.4	80	18
234	Z.I.	2006-03-01	M	1964	41	35	45	1	4.2	1	20	12.8	0	60	32.6
240	D.P.	2006-02-21	M	1940	65	29	44	1	11.5	0	2	15.9	14.2	85	7.1
242	L.D.	2005-07-21	M	1965	40	45	45	0	53.4	1	11	21.1	20.1	77	38.6
244	G.T.	2006-10-23	M	1947	59	27	43	1	26.7	0	9	23.9	25	83	17.8
245	B.A.	2006-10-12	M	1949	56	38	49	1	55.2	0	8	23.5	21	92	5.7
247	R.C.	2006-10-17	M	1941	65	35	51	1	38.8	0	6	20.9	18.6	80	26.3
249	I.A.	2006-10-09	M	1976	30	31	40	0	49.8	1	14	15.2	12.3	86	30.5
255	C.C.	2006-10-11	M	1970	36	30	44	1	72.9	1	22	31.8	32.6	80	22.4
256	G.C.	2006-10-03	M	1950	56	36	49	1	22.4	1	15	19.2	15.9	88	8.5
258	T.L.	2006-09-26	M	1952	54	29	43	1	17.1	1	10	18.9	17.1	76	12.2
259	A.D.	2006-09-27	M	1955	50	47	50	1	72.4	1	16	14.1	14	82	42.4
261	P.M.	2006-09-25	M	1952	54	47	50	1	40.2	1	12	17.4	15.8	68	37.2
262	B.B.	2006-09-25	M	1977	29	30	41	0	12.3	1	14	23.3	15.3	88	1.6
264	Z.C.	2006-10-04	M	1953	53	35	47	1	25.8	1	15	21.2	15.7	80	17.8
265	M.P.	2006-09-20	M	1950	56	42	54	1	24.1	0	5	18.5	21.7	43	30.4
269	N.I.	2006-08-30	M	1957	49	48	53	0	60.5	1	21	17.7	17.5	74	0
272	C.I.	2006-08-28	M	1949	57	26	41	1	23.4	1	10	23.8	24.3	95	0
273	B.I.	2006-08-10	M	1954	52	29	39	0	43.8	1	13	20.8	18.1	86	15
275	B.N.	2006-07-27	M	1942	64	32	45	0	23.6	1	12	18.4	16	82	23.6
278	C.D.	2006-07-11	M	1961	44	31	41	0	18.9	1	12	17.6	13.3	88	3.3
279	H.R.	2006-06-29	M	1968	38	33	41	1	1.2	0	9	12.9	0	91	1.5
280	C.D.	2006-07-02	M	1971	35	22	45	0	31.4	1	13	25.6	20.6	91	6.4
281	J.V.	2006-07-03	M	1952	54	27	44	0	19.5	1	11	18.7	14.2	89	5.6
282	L.P.	2006-08-16	M	1962	44	27	42	0	47.7	0	8	29	31.7	75	16.8
284	M.P.	2006-08-16	M	1957	49	22	40	0	24.6	1	13	18.2	16.1	90	5.6
285	F.I.	2006-07-04	M	1939	67	38	48	1	39	1	16	22.8	20.7	86	6
287	M.E.	2006-07-05	M	1950	55	30	45	1	52.3	0	8	21.6	18.7	84	12.1
288	A.M.	2006-07-07	M	1952	53	27	42	1	20.4	0	5	27.2	27.7	78	26.5
294	G.P.	2006-06-06	M	1955	51	32	45	1	45	0	9	34.5	35	79	28
295	A.B.	2006-06-06	M	1976	29	33	45	1	25.1	0	6	20.3	17.5	89	6.6
299	D.E.	2006-06-21	M	1957	48	33	47	0	84.6	1	20	21.6	21.6	61	61.5
308	B.I.	2006-11-08	M	1948	58	39	53	1	4.7	0	8	13.5	13.9	91	1.6
309	C.I.	2006-10-31	M	1943	63	31	46	0	22.9	0	3	21.2	12.5	86	5.9
320	M.C.	2006-11-16	M	1978	28	27	38	0	18.9	0	3	28.6	16.5	88	2.9
329	S.I.	2006-12-18	M	1978	28	30	44	0	11.5	1	12	18.6	17.5	89	3.1
330	H.M.	2006-11-23	M	1942	64	21	37	1	29.3	1	10	22.6	26.1	90	2.9
332	M.J.	2006-11-24	M	1938	68	35	47	0	36.4	0	17	22.6	16.3	80	17.6
333	M.I.	2006-09-12	M	1946	60	30	42	1	37	0	9	22.8	24.3	92	3.7
334	Z.V.	2006-11-28	M	1959	47	33	46	1	15.8	0	5	26	17.4	90	2.6
339	M.P.	2006-12-07	M	1929	77	31	45	1	57	1	14	20.4	20.1	71	52.1
342	P.M.	2007-01-08	M	1957	49	24	43	1	34.7	0	3	16.1	15.9	86	8.1
345	M.I.	2005-06-07	M	1954	50	28	45	0	61.4	0	5	30.9	32.5	80	42.4
349	I.S.	2005-06-21	M	1954	51	28	47	1	48.8	1	12	25.6	18.2	75	36.2
350	S.O.	2005-06-21	M	1966	39	28	45	1	45.5	1	13	21.9	16.6	90	8.3
351	P.N.	2005-06-23	M	1954	50	27	41	0	28.5	1	10	23.6	21.2	91	2.2
354	D.F.	2005-06-27	M	1936	69	36	45	0	8.4	0	7	15.7	16.3	79	10
357	N.M.	2005-06-28	M	1951	54	38	44	1	18.9	1	10	25.6	21.4	90	9.4
361	B.S.	2005-07-14	M	1953	52	27	47	1	0.9	1	12	13.2	0	80	1.1
365	M.N.	2005-08-24	M	1950	54	31	47	0	14	1	10	19.2	16.9	87	3.8
366	M.S.	2005-08-25	M	1953	51	33	52	0	17.8	1	10	16.4	16.3	60	13
368	T.D.	2005-09-12	M	1956	50	42	52	1	100.3	1	18	19.7	17.7	39	109
369	O.I.	2005-09-26	M	1947	57	41	50	1	41.9	1	14	19.9	16.7	61	38.1
373	I.G.	2005-09-28	M	1975	30	37	47	0	83.1	1	15	24.6	25	72	73.4
374	S.G.	2005-09-28	M	1948	57	36	45	1	17.4	0	7	34.3	38.9	93	1.7
376	T.I.	2005-10-05	M	1952	53	30	42	0	1.9	0	1	14.6	0	90	0.9
378	T.A.	2005-10-10	M	1948	57	36	47	1	18.2	1	10	21.2	16	87	5.1
379	H.A.	2005-10-11	M	1945	61	34	43	1	20.7	1	10	19.3	15.5	41	7.7
394	S.F.	2006-12-13	M	1959	47	38	48	0	84.5	1	14	27	26.1	74	76.4
397	S.I.	2006-12-11	M	1952	54	36	46	0	76	1	18	29.6	29.4	57	73.4
401	M.Z.	2007-01-25	M	1976	30	28	41	0	46	0	3	22.1	15.2	90	4.5
402	B.P.	2007-01-30	M	1957	49	27	45	0	59.6	1	11	20.9	21	79	27.7
406	B.E.	2007-01-09	M	1942	64	35	46	1	40.8	1	11	22.2	17.7	77	27.2
407	M.M.	2007-02-13	M	1946	60	37	53	1	57.3	1	11	28.3	30.3	39	64.8
411	B.M.	2007-01-23	M	1975	31	31	44	1	39.5	0	1	22	17.1	77	13.1
412	T.V.	2007-01-24	M	1946	60	25	40	1	41.7	1	6	19.1	14.4	87	6.1
414	M.C.	2007-01-18	M	1954	52	33	48	1	45.4	1	11	24.8	15.9	84	6.6
416	C.I.	2007-01-18	M	1949	57	27	43	1	35.5	1	9	20	21	88	11.5
417	M.P.	2007-01-23	M	1923	83	27	42	1	44.4	0	2	25.7	27.9	63	9.4
419	N.I.	2007-01-09	M	1949	57	42	47	1	73.8	1	12	22.5	22.6	37	124.2
423	H.I.	2007-03-07	M	1948	58	50	50	1	66.6	1	13	32.6	34.7	40	67.6
429	C.S.	2007-02-05	M	1967	40	33	45	1	65.7	0	18	23.2	21.2	72	66.1
431	R.F.	2007-02-07	M	1972	34	31	49	0	102	1	16	14.5	14.1	82	72
432	T.N.	2007-03-19	M	1970	37	37	42	1	30.5	0	9	14.8	13.7	86	23.2
434	B.N.	2007-03-06	M	1958	49	26	37	1	44.5	0	11	20.5	14.7	75	15.8
442	B.V.	2007-02-16	M	1967	39	40	49	1	17.9	0	6	17.1	15.3	55	20.8
443	L.V.	2007-02-17	M	1953	53	19	36	0	12.6	1	11	23.7	19.2	93	0.3
445	D.F.	2007-02-19	M	1967	39	32	45	0	1.1	0	13	12.9	0	69	3.7
447	S.A.	2007-02-20	M	1957	49	31	46	1	54.6	1	7	19.7	16.6	90	15
450	L.M.	2007-03-04	M	1959	47	46	46	1	68.2	1	12	21.8	21.9	55	75.5
451	B.I.	2007-02-24	M	1959	47	38	46	1	55.3	1	10	19	13.8	80	37.4
452	N.C.	2007-02-26	M	1966	40	33	45	1	43.8	1	14	19.5	14.3	89	13.9
457	M.O.	2007-03-10	M	1966	41	29	43	1	52.8	0	15	22.3	19.5	70	18.5
458	O.S.	2007-03-06	M	1956	51	28	43	1	20.9	0	3	20.8	19.3	87	1.8
459	D.G.	2007-04-19	M	1958	48	29	41	0	65.4	0	6	16.5	15.3	49	96.5
462	C.G.	2007-03-21	M	1977	29	30	43	1	24.5	1	13	17	13.3	92	4.1
464	T.N.	2007-03-27	M	1947	59	26	39	1	7.3	1	4	14.2	13	91	1.4
465	P.Z.	2007-03-30	M	1939	67	28	41	1	29	1	12	22.6	23.2	92	1.1
466	N.G.	2007-03-29	M	1957	49	32	46	1	6.7	1	3	13.2	12.5	87	2.8
467	R.C.	2007-03-27	M	1979	27	33	44	0	56.3	1	19	30.5	32.1	48	43.8
468	B.M.	2007-04-04	M	1986	21	29	45	0	91.3	1	7	26.7	27.6	37	86.6
470	G.E.	2007-03-26	M	1937	69	30	39	0	44.3	1	9	23.6	21.1	88	10
471	B.M.	2007-04-10	M	1946	60	29	38	1	43.6	0	1	52.5	15	76	16.2
474	T.R.	2007-04-13	M	1970	36	27	43	0	26.2	1	14	21.6	16.7	86	6.9
475	K.S.	2007-04-16	M	1952	54	33	41	1	41.5	1	8	20.7	22.7	88	15.4
476	S.D.	2007-04-18	M	1968	38	28	42	0	28.4	1	12	23.2	18.6	84	9.5
481	B.L.	2007-04-22	M	1973	33	27	43	0	58.7	0	9	25.1	24.5	89	5.1
483	T.A.	2007-05-22	M	1980	26	32	43	0	35.5	1	11	23.8	21.4	87	10.7
484	V.N.	2007-05-24	M	1958	48	43	48	1	50.4	0	6	18.7	19	56	50.9
485	R.L.	2007-04-20	M	1960	47	36	50	0	15.9	1	13	29.3	22.5	84	7
486	B.M.	2007-04-20	M	1964	43	41	46	1	38	1	8	18	13.7	57	11.1
489	N.M.	2007-04-25	M	1962	44	30	46	1	22.3	1	10	19.7	12.9	89	6.6
493	B.C.	2007-04-25	M	1939	67	42	45	1	70	0	14	19.1	19.1	66	44.4
496	O.A.	2007-05-07	M	1976	30	21	37	0	18.2	0	6	23.3	15.1	88	2.3
497	D.I.	2007-05-08	M	1972	35	34	48	1	20	0	5	25	15.3	81	6.1
499	T.T.	2007-06-06	M	1940	66	31	44	1	50.8	0	14	20.5	18.8	97	0
501	O.N.	2007-06-20	M	1959	47	24	43	1	60	1	7	19.1	16.7	86	18.7
502	G.V.	2007-09-25	M	1987	20	21	38	0	4.8	0	2	22.3	14.8	95	3.4
510	P.D.	2007-05-24	M	1956	50	35	46	1	52.4	1	14	22.3	22.3	72	28.6
512	R.C.	2007-06-04	M	1964	42	31	47	1	23.6	1	10	19.7	17.9	92	2
513	P.I.	2007-06-01	M	1972	35	31	43	0	31.9	0	2	24.3	24.3	92	5.4
516	P.I.	2007-06-23	M	1974	32	26	42	0	29.6	0	2	24.3	22.2	86	10.8
517	P.V.	2007-06-04	M	1950	57	32	46	1	43.3	0	3	21	17.3	74	15.6
518	I.N.	2007-05-30	M	1965	42	38	46	0	15.4	0	5	21.8	0	90	0
519	M.C.	2007-07-03	M	1971	36	33	45	0	38.9	0	2	21.4	19.4	77	21
520	M.I.	2007-06-02	M	1954	53	35	48	1	42.5	0	7	23.5	22	79	33.6
522	G.E.	2007-06-11	M	1947	59	24	41	1	20.1	0	2	22.7	14.8	90	2.8
530	M.C.	2007-10-22	M	1955	52	28	43	0	34.1	0	5	19.8	18	79	3.6
532	P.L.	2007-10-10	M	1956	51	34	44	0	93	1	15	22.7	22.7	21	87.2
535	B.I.	2007-10-31	M	1964	43	32	46	1	32.5	1	6	24.8	25.3	76	4.9
536	S.V.	2007-10-08	M	1962	45	45	48	1	57.9	1	16	22	22.8	72	24.3
539	C.C.	2007-10-15	M	1957	50	34	44	1	58.8	0	13	20.1	18.4	79	19
543	O.D.	2007-11-02	M	1966	41	30	46	0	42.1	1	9	17.9	16.8	80	23.1
544	D.G.	2007-10-15	M	1943	64	33	55	0	34.9	0	15	20.4	17.1	65	18.5
548	E.G.	2007-09-26	M	1968	38	39	54	1	57.2	0	2	17.3	17.1	77	32.8
549	B.I.	2007-10-01	M	1953	54	26	38	1	42.2	1	13	22.3	18.4	65	12.6
557	C.P.	2007-09-03	M	1950	57	37	49	1	55.1	1	11	20.9	21.3	80	14.3
559	C.A.	2007-08-02	M	1976	31	30	50	0	74.4	0	2	24.9	26.7	51	70.2
561	T.P.	2007-09-24	M	1943	64	39	49	1	53.7	1	12	25.1	26.8	48	31.3
563	R.N.	2007-09-10	M	1951	55	35	47	1	31.9	1	16	22.3	24.4	88	3.3
570	V.A.	2007-07-16	M	1939	68	28	44	0	22.3	1	9	21.2	23.6	92	1.8
571	B.C.	2007-09-12	M	1968	39	37	48	1	45.8	1	14	15.5	13.8	87	18.2
574	S.A.	2007-07-21	M	1978	29	28	41	0	32.7	1	12	19.2	16.3	86	16.6
575	P.O.	2007-07-27	M	1972	34	37	47	1	64.1	0	3	19.4	18.4	83	33.1
576	T.I.	2007-07-04	M	1958	48	44	47	1	26	1	14	18.8	17.6	86	18.6
577	M.R.	2007-06-20	M	1959	48	58	56	1	12.4	1	16	13.3	10.8	80	32.4
586	I.I.	2007-07-11	M	1954	52	28	42	1	74.2	1	15	30.6	32	37	67
587	C.N.	2007-07-09	M	1954	53	30	44	1	23.2	1	9	21.4	20.6	86	6.6
589	V.L.	2007-06-20	M	1952	54	29	38	0	68	1	14	21.9	20.6	79	44.8
591	M.C.	2007-06-25	M	1966	41	25	43	1	44.8	1	12	20.4	17.8	88	8.7
592	P.T.	2007-07-25	M	1963	44	31	42	0	24	1	8	24.1	22.6	86	6.3
595	L.M.	2007-07-23	M	1966	41	36	43	1	30.8	0	2	15.9	13.3	89	9.6
596	C.G.	2007-06-13	M	1948	58	32	42	1	39.1	1	4	19.4	17.4	88	13.3
597	B.V.	2007-07-03	M	1951	55	41	48	1	74.1	1	7	23.1	23.3	58	50
598	D.V.	2007-07-23	M	1952	54	27	40	1	16.1	1	10	17.4	15.1	81	8
599	T.I.	2008-02-01	M	1945	62	33	47	0	45.6	1	15	21.3	21.7	83	32.9
605	M.G.	2008-03-05	M	1944	64	34	47	1	25.1	1	13	19.3	20.4	79	6.1
606	T.V.	2008-02-25	M	1968	39	28	44	1	73	0	5	33.8	35.7	26	74.4
608	S.I.	2008-01-22	M	1968	40	34	43	0	82.9	1	14	26.8	27.3	79	77.8
610	H.I	2008-01-28	M	1948	59	48	50	1	63.2	1	20	17.4	17.1	65	49.6
614	S.I.	2008-01-20	M	1958	49	32	45	0	13.4	1	2	19.2	15.8	90	7.9
618	N.F.	2008-02-11	M	1953	54	30	45	1	26.4	0	10	16.8	14.9	92	5.7
619	G.S.	2008-01-09	M	1932	75	31	46	1	40.8	0	16	21.3	19.9	91	28.6
623	V.V.	2008-01-07	M	1976	31	38	46	0	45.3	0	3	21.4	15.7	80	22.2
624	H.F.	2008-01-04	M	1986	21	28	40	0	35.9	1	13	21.8	21.7	75	6
625	C.D.	2008-01-07	M	1945	62	33	42	0	30.7	0	5	18.7	15.2	91	0.8
626	S.G.	2008-01-16	M	1972	35	32	46	0	24.2	0	9	16.2	13.6	83	10.2
627	V.A.	2008-01-21	M	1980	27	41	43	1	120.9	1	15	18.6	18.7	80	69
628	R.I.	2008-01-03	M	1945	62	39	52	0	19.3	1	8	19	13.7	86	5.3
630	C.G.	2008-01-24	M	1958	49	32	48	1	29	1	5	20.8	16.4	85	40.8
636	B.I.	2007-12-13	M	1937	70	35	45	1	35.7	0	3	25.6	24.6	77	9.6
637	O.S.	2007-12-23	M	1936	71	35	45	1	73.3	1	17	16.4	14.6	80	23.2
638	A.I.	2007-12-12	M	1951	56	32	46	1	1.9	1	12	14.2	14.8	76	7.5
642	L.G.	2007-12-04	M	1949	58	30	45	0	9.5	0	3	18.6	16.5	84	3.9
647	L.I.	2007-12-20	M	1957	50	33	45	1	23.3	0	5	18.7	18	68	42.9
648	R.V.	2007-11-27	M	1951	56	25	40	1	10.8	0	6	17.1	12.8	92	0.4
649	R.A.	2007-11-26	M	1978	29	27	39	0	7.4	0	2	17	13.2	94	0.5
653	S.F.	2007-11-22	M	1975	32	32	48	0	9.7	1	10	17.4	12	89	1.3
654	N.D.	2007-11-29	M	1952	55	29	46	0	48.6	0	5	20.7	21.7	77	9.4
655	B.A.	2007-12-17	M	1947	60	41	46	1	19.7	0	5	17.3	14.3	91	0
656	C.S.	2006-02-28	M	1970	35	38	43	0	46.5	0	3	20.4	16.4	88	5.7
657	I.D.	2007-11-20	M	1972	35	34	45	1	79.3	0	10	17.9	13.7	79	30
658	V.M.	2007-11-16	M	1957	50	36	39	1	28.9	0	12	16.4	13.6	81	23.8
660	G.F.	2007-11-13	M	1939	68	31	48	1	47.5	0	3	19.6	18.6	80	43.8
664	T.R.	2007-11-09	M	1981	26	29	46	0	98.9	1	11	17.9	18	83	82.5
665	S.G.	2007-11-14	M	1976	31	37	44	1	52.3	0	1	14.9	13.4	91	22.1
667	P.A.	2007-12-03	M	1959	48	27	43	0	29.3	0	8	19	19.4	91	2.7
670	F.J.	2007-11-04	M	1954	53	34	48	1	23.7	1	11	18.9	16.7	84	21.5
676	G.G.	2007-10-28	M	1932	75	33	50	1	71.8	1	8	28.5	27.8	81	65.6
678	C.I.	2007-11-15	M	1959	48	44	50	1	15.9	0	7	17	13.9	90	2.7
679	B.A.	2008-02-28	M	1965	43	31	40	1	23.3	1	4	17.8	15.2	85	7.4
681	D.C.	2008-02-04	M	1955	52	33	43	1	23.9	1	9	23.2	22.5	68	6.3
682	J.I.	2008-03-24	M	1975	32	27	42	1	31.9	1	15	23.8	17.9	82	7.5
684	P.I.	2008-02-28	M	1943	65	27	42	1	23.4	1	8	15	13.4	83	9.9
685	T.M.	2008-02-10	M	1975	32	31	46	1	38.6	1	11	20	18.9	85	11.6
689	T.N.	2008-04-02	M	1945	62	27	41	1	49.2	0	8	26.7	27.1	83	19
690	F.N.	2008-02-11	M	1948	60	30	43	0	25.8	1	9	19.4	16.5	73	3.3
695	F.V.	2008-02-18	M	1956	51	28	45	0	80.2	0	17	24.3	24.6	68	41.2
697	D.F.	2008-02-18	M	1966	41	39	52	1	67.3	0	8	19.9	19.7	84	98.2
698	T.I.	2008-02-21	M	1958	49	53	53	1	102.2	1	14	17.4	17.6	69	104
700	L.G.	2008-03-24	M	1951	56	37	52	1	57.7	0	3	22.3	20.7	88	8.8
703	T.G.	2008-03-14	M	1968	40	35	46	0	37.8	1	14	19.2	16.9	87	12.8
704	B.A.	2008-03-09	M	1963	45	28	46	0	53.2	1	11	22	22.9	73	27.4
705	M.S.	2008-03-06	M	1959	48	73	54	1	66.4	1	13	18.5	15.7	36	51.2
708	R.M.	2008-03-10	M	1942	65	23	39	1	7.5	0	3	20.4	15	83	1.5
711	P.D.	2008-03-03	M	1954	53	27	46	0	31.3	0	7	19.7	19.3	87	3.3
718	M.D.	2008-03-12	M	1960	48	35	49	1	34.2	1	14	24.1	23.5	79	20.9
720	R.V.	2008-03-12	M	1962	45	36	48	0	67.9	0	7	25.5	26.9	44	42
722	I.N.	2008-03-26	M	1953	54	43	47	1	71.7	1	14	20.4	18.8	84	58.1
723	C.N.	2008-03-10	M	1951	56	39	51	1	71.9	1	14	27	27.6	69	59.3
725	B.G.	2008-03-26	M	1941	66	38	51	1	79.8	1	10	22.6	22.1	92	0
726	R.M.	2008-03-25	M	1964	44	33	44	0	71.1	1	16	22.1	21	77	52.3
728	A.P.	2008-03-20	M	1948	60	36	48	1	12	1	13	20.7	12.4	93	2.1
732	P.I.	2008-03-17	M	1951	56	42	50	1	45.8	1	11	19.3	15.9	86	16.8
734	D.I.	2008-03-16	M	1950	57	35	49	1	62.3	1	22	43.6	38.9	93	0
736	V.I.	2008-04-02	M	1950	57	23	42	0	39.6	1	11	21.3	21.4	67	10.7
737	A.V.	2008-03-31	M	1957	50	29	45	1	17.5	0	8	22.9	23.5	63	5.5
738	Z.A.	2008-03-31	M	1940	67	23	41	0	30.2	0	16	31.7	34.5	86	5.3
739	M.G.	2008-04-01	M	1944	64	32	37	1	64.5	1	5	20.4	19.4	74	35.7
740	C.N.	2008-03-28	M	1969	39	39	53	0	27.5	1	8	17.2	15.3	81	15.6
742	H.I.	2008-03-29	M	1955	52	25	36	1	38.3	1	11	23.4	23	85	4.8
744	P.C.	2008-04-06	M	1947	60	24	43	1	9.6	0	2	18.1	18.7	87	0.8
745	C.M.	2008-04-07	M	1959	49	37	46	1	33.5	1	13	16.6	15.9	84	20.6
746	H.A.	2008-04-06	M	1964	43	31	44	0	72.8	1	16	34.8	35.1	50	66.1
751	S.T.	2008-04-15	M	1940	67	32	40	1	17.8	1	11	19.1	16.3	81	11.1
753	S.M.	2008-04-14	M	1950	57	38	46	1	16.5	1	14	15.7	15	69	19.8
768	I.I.	2008-04-16	M	1951	57	42	57	1	69.5	1	18	18.4	18.9	78	52.1
769	C.C.	2008-04-16	M	1959	49	29	45	1	41.2	0	10	21.1	18.3	83	1.3
771	B.C.	2008-04-23	M	1944	64	33	50	1	53.5	1	12	15.9	15.7	79	28.1
772	S.E.	2008-04-23	M	1966	42	28	44	0	19.5	1	4	19.8	14.5	84	5
780	M.N.	2008-05-05	M	1952	55	41	51	1	30.8	0	8	17.4	13.9	82	10.6
783	Z.C.	2008-05-12	M	1938	69	24	44	1	22.2	1	13	22.9	22.3	87	5.5
784	N.C.	2008-05-09	M	1985	22	28	39	0	11.5	0	5	13.7	12.4	87	4.6
787	D.A.	2008-05-07	M	1968	39	38	51	1	86.2	0	11	23.6	24.1	64	75.3
788	B.D.	2008-05-07	M	1951	56	39	48	1	36.3	1	15	20	18	90	11.6
789	S.C.	2008-05-08	M	1969	39	32	43	0	17.4	0	8	16.8	11.2	75	4.8
790	Z.S.	2008-05-22	M	1944	63	33	42	0	41	1	1	20.5	20.6	72	26.4
793	B.P.	2008-05-17	M	1955	52	29	46	1	36.3	0	12	22.9	18.9	85	11
797	M.C.	2008-05-14	M	1953	54	33	51	1	76.7	1	12	31.9	32.8	82	46.9
799	T.D.	2008-05-13	M	1963	45	32	44	0	71.9	1	15	36.7	37.3	28	69.8
801	C.C.	2008-05-12	M	1969	38	30	40	1	16.3	1	14	18.4	16.2	85	6.1
804	B.P.	2008-06-02	M	1939	68	29	45	1	35.2	0	5	22.7	20.8	85	51.9
805	T.V.	2008-05-20	M	1973	34	38	51	1	83.5	1	12	16.4	15.7	80	87.9
806	C.D.	2008-05-20	M	1942	66	38	47	1	16.2	0	5	21.2	17.4	72	8.2
810	P.V.	2008-05-22	M	1947	61	34	35	1	37.4	0	10	18.8	16.3	83	5.2
814	F.I.	2008-05-26	M	1955	52	37	47	1	83.3	1	8	21.2	22	68	65.1
817	K.D.	2008-05-26	M	1980	27	36	48	0	26.6	0	13	23.9	17.5	89	3.5
819	T.E.	2008-06-04	M	1963	44	24	38	0	18.9	1	14	22	20.8	85	6
824	G.C.	2008-06-10	M	1968	40	25	38	1	53.5	0	4	22.8	27.3	85	13.1
825	Z.M.	2008-06-09	M	1951	56	35	48	0	43.5	1	11	24.2	21.8	89	1.4
826	J.F.	2008-06-09	M	1968	40	27	41	1	12.3	1	6	19.2	14.3	94	0.4
827	D.L.	2008-06-30	M	1954	53	38	46	1	20.7	1	15	25.6	20	67	67.8
828	Z.C.	2008-06-05	M	1973	34	28	40	0	18.6	0	12	20.4	19.2	73	11
829	M.D.	2008-06-11	M	1978	30	33	48	1	57	0	5	19.6	16.2	84	14.4
833	M.I.	2008-06-16	M	1978	29	25	41	0	48.9	1	8	20.3	16.2	90	5.1
834	C.V.	2008-06-17	M	1955	53	31	47	0	87.7	1	15	29.4	28.4	59	86.4
837	K.S.	2008-06-12	M	1970	38	33	45	0	20.6	0	12	22.5	20	92	1.5
838	C.I.	2008-06-11	M	1939	68	32	45	1	24.3	1	8	18.8	16.1	70	34.8
842	N.M.	2008-07-07	M	1956	51	31	44	1	45.2	1	10	19.9	20.2	56	29.6
844	R.G.	2008-07-03	M	1950	57	34	43	1	50.1	0	15	18.5	16.2	80	16.4
847	B.G.	2008-07-03	M	1968	40	39	47	0	71.1	0	16	34.2	33.9	58	63.9
861	W.T.	2008-06-23	M	1970	38	33	45	1	70.7	1	12	21.6	22.2	65	52.5
872	C.T.	2008-07-23	M	1938	70	31	45	0	29	0	6	22.1	19.3	85	8.6
873	G.S.	2008-07-16	M	1974	33	28	39	0	70.9	1	15	35.6	36.6	53	75.1
875	V.M.	2008-07-23	M	1976	32	35	44	1	39.8	1	15	21.6	21.9	82	18.5
877	V.S.	2008-07-23	M	1957	50	33	47	1	37.1	1	12	20.1	16.8	81	9.7
878	T.N.	2008-07-28	M	1942	66	39	50	1	71.1	1	20	28.8	29.8	57	64.6
879	V.S.	2008-07-22	M	1971	37	28	38	1	10.1	1	12	18.2	15.5	96	0.1
880	N.I.	2008-08-04	M	1950	58	38	50	1	33.7	1	16	19.9	15.8	82	3.4
881	G.M.	2008-07-30	M	1946	62	32	43	1	68.2	1	13	36.3	37.9	74	64
884	C.S.	2008-08-04	M	1972	36	21	34	1	9.2	0	8	23.5	33	83	0.9
885	T.I.	2008-07-31	M	1950	58	31	42	1	39.2	0	9	21	16.5	83	28.1
887	S.M.	2008-08-05	M	1978	29	22	42	0	33.2	0	2	18.5	16.9	87	5.4
888	P.C.	2008-09-02	M	1976	31	32	44	1	18.7	0	2	21	18.9	74	4.3
889	D.D.	2008-08-08	M	1939	68	50	40	1	55.1	1	20	20.1	19.6	46	36.9
890	R.I.	2008-08-06	M	1947	61	34	52	0	61.7	0	6	18.3	17.1	81	60.8
891	S.S.	2008-08-06	M	1969	39	33	44	1	53.3	1	9	22.4	20.6	73	23
900	H.I.	2008-09-03	M	1938	70	35	46	1	16.3	0	14	20.8	18.1	79	80
904	O.D.	2008-09-04	M	1939	69	30	45	0	30.9	1	10	26.6	28.4	79	7.4
907	S.L.	2008-09-08	M	1974	33	22	39	0	18.3	1	8	19	16	95	0.1
909	F.F.	2008-09-17	M	1971	36	47	48	1	46.6	1	8	20.1	21.9	80	21.6
913	P.L.	2008-09-18	M	1950	57	43	47	1	67.1	1	16	21.9	20.5	71	62.5
915	B.I.	2008-09-23	M	1970	38	36	49	1	13.6	0	8	22.9	20.6	91	3.7
917	P.L.	2008-09-23	M	1962	46	31	49	1	14.8	0	5	22.5	17.6	88	2.9
920	B.M.	2009-09-24	M	1933	75	36	47	1	36.7	1	12	27.3	30.1	63	16.8
921	T.L.	2008-09-25	M	1957	51	43	42	1	26.2	1	10	20.2	15.8	86	2.9
922	I.D.	2008-10-01	M	1967	41	43	43	1	96.3	0	9	22.9	23.6	54	92.9
925	P.G.	2009-10-02	M	1951	57	33	44	1	27.2	1	10	23.7	23.1	88	1
926	M.M.	2008-10-13	M	1969	38	46	46	1	120.8	1	18	16.6	16.8	51	118.7
928	C.A.	2008-10-09	M	1956	52	34	45	1	46.6	0	10	20.6	20.2	80	27.3
929	S.L.	2008-10-14	M	1973	34	29	44	0	19.4	0	4	19.9	16.1	88	1.9
931	I.C.	2008-10-14	M	1960	48	35	50	1	34.4	0	2	17.7	16.4	59	19.1
932	S.S.	2008-10-20	M	1965	43	39	49	1	38.8	1	20	17	16.1	88	12.8
937	T.A.	2008-10-22	M	1956	52	30	42	1	37.5	0	3	20.5	16	88	10
938	H.T.	2008-10-16	M	1953	54	33	43	1	17.2	1	7	18.5	16.4	89	3.4
942	H.I.	2008-10-22	M	1943	65	33	45	1	36.7	1	15	24.5	25	72	15.3
945	S.C.	2008-10-23	M	1948	60	30	44	0	33.1	0	8	21.6	22.6	58	5.2
947	C.P.	2008-11-19	M	1965	43	42	47	0	57	1	15	16.3	15.1	27	53.9
951	D.I.	2008-11-07	M	1938	70	36	48	1	56.7	0	5	18.7	17.7	42	49.2
954	M.A.	2008-11-17	M	1940	68	47	45	1	39	1	8	20.3	19.5	85	15.8
960	L.G.	2008-11-03	M	1960	48	40	45	0	68.9	0	10	23.6	23.6	79	45.6
964	M.V.	2008-10-29	M	1952	56	35	45	1	15.1	0	10	18.2	19	92	0
966	P.I.	2008-10-28	M	1961	46	32	44	0	17.7	0	2	26.9	27.5	76	3
972	M.C	2008-11-24	M	1959	48	35	45	1	54.8	1	11	19.4	18.2	80	43.4
976	B.D	2008-11-12	M	1956	52	39	47	1	42.8	0	8	17.8	16.4	84	20.1
977	D.G	2008-11-12	M	1952	56	24	40	1	58.1	1	12	24	23.9	66	37.4
979	I.I	2008-12-03	M	1957	51	38	43	0	43.9	1	8	19	18.7	81	24.6
982	S.M	2008-11-18	M	1957	52	32	44	1	91.4	1	15	22.3	22.3	57	95.1
990	R.N.	2009-01-13	M	1961	47	35	50	1	74.7	1	20	31.5	32.1	43	66.1
991	S.S	2008-12-15	M	1945	63	30	47	1	32.2	1	12	19.5	18.9	81	9.7
995	R.C.	2008-11-26	M	1959	49	32	46	1	57.8	1	12	23.6	23	78	10.9
997	B.F	2008-11-29	M	1979	29	26	43	1	41.6	0	5	19.5	17.7	79	9
999	A.M.	2008-11-28	M	1974	34	28	40	0	27.3	1	7	23.1	20.4	88	8.9
1000	S.B.	2008-12-17	M	1986	22	23	37	0	13.3	1	12	17.2	12.6	86	3
1001	L.M.	2008-12-11	M	1960	48	34	45	1	47.7	1	11	20.5	15	95	0
1004	B.I.	2008-12-17	M	1976	31	37	52	1	35.6	0	10	20	22.8	63	11.8
1007	N.N.	2008-12-31	M	1944	64	32	50	1	62.4	0	17	23.5	24.5	63	51.1
1011	P.C.	2009-01-07	M	1979	29	32	38	1	10.6	0	2	17.2	14.1	83	1.3
1027	H.R.	2008-12-23	M	1982	26	34	44	0	21.8	1	7	14.9	12.3	84	11.7
1029	U.M	2009-01-12	M	1972	36	33	47	0	40.7	0	3	18.5	17.2	76	41.2
1030	F.T.S	2009-01-13	M	1968	40	30	45	1	18.4	0	3	22.7	21.7	80	7.2
1031	S.M.	2009-01-06	M	1979	29	27	42	0	35.8	1	15	20.9	19.4	86	3.6
1036	N.G.	2009-01-12	M	1963	45	34	50	1	96.8	0	3	17.8	18.2	48	68
1038	F.F.	2009-01-21	M	1938	70	29	42	1	46.7	1	8	24.7	25.8	77	23.3
1039	P.P.	2009-01-14	M	1952	56	28	43	0	7.8	0	5	16.7	13	79	9.4
1040	K.M.	2009-01-16	M	1950	59	40	53	1	54	0	12	21.4	19.2	88	10.9
1041	A.S.	2009-01-21	M	1978	30	28	40	1	55.5	1	11	21	21	85	12.4
1042	D.M.	2009-01-15	M	1952	56	33	45	0	33.5	0	21	35.7	39.1	83	5.6
1043	C.M	2009-01-26	M	1962	46	35	49	1	91	1	14	21.7	22	76	71.5
1044	P.A.	2009-01-20	M	1975	33	20	36	0	10.2	1	5	21.1	19.1	88	1.7
1047	Z.N.	2009-01-23	M	1958	50	50	51	1	40.1	1	15	24.1	25.7	76	20.2
1049	M.D.	2009-01-26	M	1959	49	30	46	1	24.6	0	2	22.7	25.7	96	0.3
1051	C.F.	2009-02-09	M	1968	40	29	42	1	42.3	0	5	20.2	18.3	91	2.2
1052	B.M.	2009-02-09	M	1971	37	40	53	0	27.3	0	5	17.3	15.7	66	18.9
1053	C.B.	2009-01-28	M	1958	50	27	47	0	13.9	0	3	18.7	15.9	84	7.6
1055	I.I.	2009-02-02	M	1956	52	35	46	1	89.8	1	20	23.6	22.5	65	74.8
1058	B.S.	2009-02-03	M	1958	50	41	51	1	43.8	1	12	17.6	17.3	79	13.3
1063	T.P.	2009-02-08	M	1945	63	39	58	0	47.7	1	18	19.4	19.7	75	26.6
1065	C.I.	2009-02-23	M	1976	33	35	45	0	94.5	1	12	20.4	19.9	76	46.1
1067	S.L.	2009-02-11	M	1953	55	21	39	0	9.8	0	2	19.2	21.7	92	0.2
1068	H.C.	2009-02-19	M	1951	57	31	42	1	67.7	1	13	27.8	25.3	63	55.7
1073	R.L.	2009-02-25	M	1978	30	32	45	0	12.7	0	6	19.3	18.5	82	1
1074	M.C.	2009-02-17	M	1952	56	30	43	0	34	1	11	23.3	22.7	88	8.8
1075	L.V.	2009-02-18	M	1968	40	33	45	1	22.7	0	3	18.3	13.7	69	18.7
1076	T.L.	2009-02-18	M	1972	36	30	46	0	36.5	0	7	24	23.9	75	17.3
1077	L.C.	2009-02-19	M	1943	65	29	43	1	48.5	1	13	25.6	26.8	87	28
1078	V.G.	2009-02-27	M	1939	69	30	45	1	38	0	8	30.2	34.7	82	39.4
1080	I.O.I	2009-02-25	M	1953	55	36	41	1	57.3	1	8	19.5	18	79	21.8
1084	D.D.	2009-02-20	M	1971	37	25	45	0	7.1	0	8	19.6	10.9	81	0.7
1089	B.I.	2009-02-26	M	1941	67	26	42	0	49.8	1	12	24	27.8	76	10.3
1092	B.D.	2009-03-06	M	1947	61	39	48	1	86.3	1	9	15.2	15.2	53	70.4
1093	C.A.	2009-03-09	M	1968	40	26	40	0	50.6	1	7	20	16.4	72	4.6
1096	M.I.	2009-03-24	M	1948	61	29	42	0	53.6	1	9	20.4	22.1	80	21.2
1097	D.N	2009-03-11	M	1948	60	32	49	1	37.4	1	8	27.9	32.3	81	32.2
1101	V.S.	2009-03-25	M	1956	52	32	41	1	17.8	0	3	24.4	24.7	82	16
1104	S.V.	2009-03-31	M	1962	46	34	49	1	71	1	14	30.6	29.9	75	49
1105	S.C.	2009-04-07	M	1959	49	27	41	0	31.8	1	7	20.8	21.2	85	7.3
1106	P.I.	2009-04-06	M	1956	52	33	44	0	69.6	1	12	28.2	29.2	71	64.1
1107	O.S.	2009-04-09	M	1959	49	37	47	1	32	1	12	18.8	19.3	77	8.8
1110	V.N	2009-03-31	M	1930	78	33	45	0	2.8	0	13	16.9	17.3	79	9.7
1111	R.P.	2009-04-07	M	1961	48	29	45	1	17.7	1	12	19.3	18.8	87	11.1
1113	N.C.	2009-04-10	M	1968	41	41	47	1	34.2	0	5	25.1	19.1	87	21.3
1116	B.I.	2009-04-10	M	1960	48	36	43	1	11.7	0	8	12.9	12.1	84	4.8
1119	I.C.	2009-04-15	M	1939	69	20	42	1	41	1	7	19.1	21.2	84	13.4
1121	O.P.	2009-04-22	M	1937	71	36	41	1	57.7	0	4	17.6	16.9	87	16.5
1122	T.N.	2009-04-23	M	1970	38	30	41	1	30.3	0	8	14	14.2	75	20.1
1124	C.D.	2009-04-27	M	1931	78	25	41	0	36.3	0	6	19	19.3	83	6.1
1125	K.I.	2009-04-27	M	1931	77	26	40	1	9	1	2	21.2	22.6	79	4.1
1126	F.I.	2009-04-27	M	1951	57	42	49	1	28.9	1	12	18.1	15.6	75	6.9
1128	G.M.	2009-04-29	M	1972	36	29	45	0	68.4	1	17	30.5	31	44	80.1
1133	T.M.	2009-05-05	M	1949	60	45	56	1	53.6	1	15	21.4	20	83	80
1134	V.E.	2009-05-11	M	1931	77	37	57	1	34.6	1	16	19.2	19.4	75	24.8
1137	M.M.	2009-05-05	M	1953	55	32	47	1	35.8	1	13	21.3	21.9	84	22.2
1138	I.D.	2009-05-06	M	1959	50	32	46	0	66.2	1	16	37.2	38.4	66	63.3
1139	M.I.	2009-05-06	M	1961	47	36	45	1	25.9	0	12	21.3	19.2	90	10
1141	T.S.	2009-05-14	M	1956	52	34	46	1	68.6	1	12	25.1	25.7	83	38.5
1142	C.G.	2009-05-11	M	1949	59	31	44	1	30.3	0	10	19.8	20.3	81	26.2
1144	D.N.	2009-05-11	M	1948	60	28	41	1	23.3	1	9	19.1	18.7	92	1.5
1145	A.I.	2009-05-19	M	1943	65	31	47	1	22.6	1	6	24	17.9	80	23.2
1147	P.M.	2009-05-12	M	1952	57	38	48	1	10.4	1	11	15.4	15.3	73	21.9
1152	B.S.	2009-05-28	M	1964	45	25	38	1	45.9	1	10	23.8	23.7	88	9.4
1154	P.R.	2009-06-08	M	1932	76	28	47	1	18.5	1	12	18.4	20	88	2.1
1156	P.F.	2009-05-20	M	1970	38	30	39	1	22.3	1	5	20.2	18.6	85	8.5
1162	C.S.	2009-05-18	M	1941	67	33	45	0	37	0	16	21.3	22.4	84	10.6
1164	R.C.	2009-05-26	M	1946	63	38	51	1	57.4	1	15	17.6	17.1	79	66.7
1166	S.T.	2009-05-28	M	1944	65	35	45	1	17.8	1	16	24.2	25.2	80	23.2
1167	D.M.	2009-05-28	M	1963	46	33	45	0	40.4	0	4	19.6	19.4	93	0
1168	R,I	2009-05-27	M	1947	61	32	46	1	87.9	0	14	17.7	18.3	74	51.8
1169	S.A	2009-05-29	M	1958	50	30	43	1	61.1	1	7	22.8	23.3	85	23
1177	L.C.	2009-06-09	M	1977	31	26	38	0	18.3	1	10	24.1	17.7	85	4.1
1181	T.A.	2009-07-10	M	1948	61	33	50	1	45	0	6	20.4	22.8	65	18.6
1182	C.V.	2009-06-10	M	1957	51	41	49	1	28.4	1	12	21.1	14.5	86	8.7
1185	R.G.	2009-07-07	M	1944	64	35	48	1	60.2	1	14	21.3	22.9	75	32.9
1191	T.S.	2009-06-19	M	1986	22	25	45	0	24.3	1	8	20.2	18.2	80	19.9
1195	K.W.	2009-06-24	M	1950	58	34	50	0	26.4	1	12	34.6	21.5	88	14
1197	S.C.	2009-07-16	M	1945	63	25	40	0	28.7	1	9	22.4	23.3	88	3.8
1202	H.M.	2009-06-29	M	1957	51	23	40	0	39.3	0	10	21	22	69	8.6
1205	V.L.	2009-07-02	M	1952	57	38	47	1	64.1	1	7	16.4	16	88	20.4
1209	G.E.	2009-07-01	M	1955	53	37	45	1	59.1	1	12	15.1	13.4	88	29.2
1212	V.I.	2009-07-08	M	1957	51	34	45	1	41.2	0	6	17.8	17	79	25.1
1217	V.D.	2009-07-13	M	1960	48	30	44	1	33.2	0	3	23.4	23.5	89	5.2
1218	M.M.	2009-07-14	M	1940	69	33	44	1	37	1	6	19.4	16.9	76	34.5
1221	T.S.	2009-07-20	M	1960	48	26	42	0	12.6	1	3	18.4	12.6	91	0
1224	B.I.	2009-07-23	M	1956	53	34	44	0	30.2	1	10	21	19.3	76	10.3
1226	C.T.	2009-07-27	M	1938	71	28	43	1	12.1	1	14	19.6	16.9	90	1
1234	F.C.	2009-08-06	M	1953	55	30	41	0	29.8	1	11	17.1	13.8	82	12
1235	B.C.	2009-08-11	M	1948	61	27	43	1	35	0	14	20.6	21.9	89	0
1237	A.C.	2009-08-11	M	1977	32	25	40	0	30.5	0	4	26.5	26.8	89	7.8
1241	S.A.	2009-08-24	M	1949	59	30	43	1	33	1	15	24.6	23.5	81	16.5
1243	T.D.	2009-08-25	M	1960	49	29	45	1	3.7	0	8	19.2	10.5	80	3.5
1244	D.E.	2009-08-26	M	1941	68	27	41	1	18.1	0	8	17.5	15.5	89	12
1245	H.V.	2009-09-01	M	1986	23	45	48	1	12.7	1	5	18.9	15.3	92	1
1247	Z.N.	2009-08-31	M	1947	62	26	46	0	13.3	1	9	20	22.5	67	14
1256	S.C.	2009-09-11	M	1969	40	39	54	0	61.5	1	14	23.1	22.4	82	85.7
1258	V.C.	2009-09-17	M	1937	72	24	38	0	43.8	0	7	24.6	24.8	87	12
1259	R.L.	2009-09-18	M	1982	27	27	41	0	21.9	1	1	20.5	15.3	81	7
1262	C.I.	2009-09-22	M	1951	58	33	48	1	54.7	1	10	16.8	16.4	88	19.3
1264	M.M.	2009-09-22	M	1957	52	26	40	1	13.3	0	3	15.6	13.7	88	3.8
1272	T.I.	2009-10-01	M	1946	63	25	40	0	13	0	3	21	21.4	86	3
1273	C.N.	2009-10-01	M	1946	62	39	47	0	31.4	1	7	17.7	16.1	20	22.9
1275	S.A.	2009-10-26	M	1953	56	30	40	1	17	1	12	23.8	22.7	77	4.6
1277	R.G.	2009-10-07	M	1956	53	38	48	1	61.2	1	9	19.1	19.1	70	27.4
1279	M.P.	2009-10-07	M	1935	74	34	47	1	40	0	10	20.6	20	79	31
1281	B.V.	2009-10-12	M	1961	48	29	39	0	44.5	1	12	28.9	29.8	78	35.9
1286	B.P.	15.oct09	M	1944	64	39	45	1	14.8	0	7	29.1	17.2	90	2.6
1287	B.M.	2009-10-19	M	1958	51	37	46	1	54.3	1	11	20	17.3	88	33.1
1288	L.V.	2009-10-20	M	1942	67	37	47	1	55.4	0	8	23.8	24.5	53	49.5
1290	C.D.	2009-11-05	M	1959	50	29	41	0	45	0	9	19.5	19	75	15.6
1291	H.V.	2009-10-22	M	1958	51	34	45	1	7.2	1	2	18.8	15.3	90	4
1292	F.C.	2009-06-23	M	1959	49	37	47	1	84.2	1	18	25.7	25.9	69	76.6
1293	B.I.	2009-11-09	M	1952	57	45	54	1	32.1	1	21	19.8	18	86	2.6
1295	P.S.	2009-10-27	M	1972	37	30	43	1	19.5	0	6	16.9	14.1	85	14.6
1301	G.L.	2009-11-03	M	1961	48	36	47	0	61.1	1	13	35.6	36.3	35	72.5
1302	B.D.	2009-11-03	M	1955	54	32	45	0	23.8	0	10	18.2	17.1	83	16.1
1303	S.N.	2009-11-03	M	1941	68	28	40	1	11.8	1	5	21.1	16.4	84	84
1305	B.I.	2009-11-05	M	1947	62	36	43	1	81.6	1	9	22.7	23.6	80	52
1310	R.S.	2009-11-12	M	1954	55	28	41	1	10.2	0	8	19.1	21.1	89	2.1
1316	I.M.	2009-11-18	M	1947	62	31	45	0	33.1	1	7	23	23.9	87	15.4
1317	N.A.	2009-11-19	M	1947	62	30	44	1	52.3	1	11	21.2	19.3	85	23
1320	D.I.	2009-12-10	M	1952	57	33	43	1	5.8	0	8	22.2	20.8	66	3.3
1321	G.T.	2009-11-23	M	1957	52	36	47	1	60.4	1	12	21	22.3	88	30.8
1323	G.M.	2009-11-24	M	1968	41	28	41	0	47	0	2	19.7	17.8	82	14
1324	L.C.	2009-11-25	M	1947	62	36	45	1	53	1	4	23.1	22.2	79	17.9
1325	D.V.	2009-11-26	M	1968	41	37	48	1	73.2	0	20	23.6	24.8	74	58.7
1326	D.D.	2009-11-26	M	1953	56	40	52	1	40.9	0	20	22.7	23.5	41	58.2
1327	J.N.	2009-12-02	M	1963	46	41	47	0	32.6	0	8	18.2	15	78	1.9
1328	V.C.	2009-12-02	M	1980	29	35	43	0	73.5	0	8	24.6	24.1	88	65
1329	R.E.	2009-12-07	M	1960	49	35	47	1	67.5	0	6	19.1	21	76	62.3
1330	D.T.	07dc09	M	1947	62	38	47	1	10.8	0	2	21.1	19.8	85	7
1332	C.M.	2009-12-07	M	1944	65	36	49	1	43.3	0	7	16.6	16.4	88	11.4
1333	M.D.	2009-12-08	M	1964	45	30	43	0	45.8	1	8	24.2	24.1	85	29.4
1335	M.D.	2009-12-10	M	1947	62	35	46	1	46	1	7	26.7	27.3	81	15
1336	C.C.	2009-12-14	M	1942	67	46	54	1	64.8	1	16	20.5	20.9	74	84.4
1338	D.I.	2009-12-15	M	1961	48	41	41	1	31.6	0	8	22	22.3	66	22.6
1341	R.V.	2009-12-29	M	1956	53	36	47	1	28.5	1	12	26.8	27.4	78	25
1343	N.F.	2010-01-11	M	1970	39	32	47	1	77	1	18	31.1	31.7	33	77.6
1344	D.I.	2010-01-12	M	1950	59	35	48	1	15.4	0	8	23.7	22	90	12
1347	D.M.	2010-01-18	M	1957	52	31	45	1	12.5	0	6	20.5	15.7	73	7
1351	S.D.	2010-01-26	M	1964	45	34	45	0	55.8	1	12	39.3	40.7	51	44.7
1355	M.C.	2010-02-03	M	1946	63	32	39	1	44.4	1	11	23.8	23.9	79	37.1
1356	B.A.	2010-02-04	M	1941	68	26	42	0	16.6	1	12	17.2	15.9	86	3.8
1357	M.V.	2010-02-04	M	1972	37	34	47	1	82.6	1	19	26	26	68	55.8
1360	B.E.	2010-02-09	M	1965	45	40	51	1	54.4	1	18	25.2	25.6	33	45.7
1362	C.C.	2010-02-10	M	1956	54	30	43	1	4.8	1	1	18.4	15.6	95	0
1367	M.S.	2010-02-16	M	1951	59	41	55	0	25.5	1	11	17.7	15.8	53	31.9
1370	S.N.	2010-02-23	M	1943	66	35	50	0	62.6	1	14	19.3	29.8	80	80.1
1372	C.G.	2010-02-24	M	1953	56	32	43	1	44.1	1	19	20.3	20.7	80	34
1376	P.D.	2010-03-03	M	1964	45	33	46	0	101.7	1	16	21.6	23.3	72	52.4
1378	B.A.	2010-03-10	M	1979	31	28	40	0	20.7	1	10	23.1	15	85	2
1379	H.C.	2010-03-11	M	1963	46	34	45	1	34.5	1	16	20.2	15.8	78	49.7
1380	M.I.	2010-03-12	M	1954	56	36	50	1	49.6	1	4	23.1	20	76	30.8
1382	F.A.	2010-03-17	M	1948	60	29	44	1	37.5	0	4	21.4	17.7	86	13.4
1384	M.A.	2010-03-16	M	1959	51	35	45	1	47	1	8	22.8	20.7	88	27.7
1387	G.I.	2010-03-18	M	1954	56	34	48	1	24.1	0	2	20.4	14.8	82	12
1388	T.I.	2010-03-18	M	1954	56	37	46	1	100	1	23	17.3	16.5	90	43.6
1389	S.D.	2010-03-19	M	1971	38	37	45	1	46.9	1	3	21.7	18	77	32
1390	S.G.	2010-03-19	M	1981	28	26	38	0	38	1	16	21.5	18.7	85	3.8
1393	S.N.	2010-03-23	M	1963	46	34	59	1	87.7	1	10	19.9	19	59	73.9
1397	M.D.	2010-03-30	M	1968	42	37	53	1	73.8	1	15	22.4	23.2	22	63.5
1400	M.S.	2010-04-08	M	1952	57	27	42	1	30	0	5	19.7	14.2	88	17
1403	B.N.	2010-04-12	M	1948	62	33	43	1	27.8	1	13	21	16	77	11.4
1404	B.V.	2010-04-12	M	1967	42	27	41	0	42.2	1	17	21.3	21.3	88	12
1407	M.S.	2010-04-14	M	1973	37	34	43	0	10.9	0	10	17.2	18.2	80	11.1
1410	S.M.	2010-04-20	M	1946	63	36	41	1	22.8	0	10	20.4	14	90	2.1
1412	B.M.	2010-04-28	M	1969	41	31	42	0	76.6	0	6	25.1	23.6	73	56
1414	A.M.	2010-04-26	M	1970	39	30	44	0	65.4	1	12	33.7	35.4	60	72.7
1414	B.G.	2010-05-05	M	1958	52	40	46	0	53.8	0	3	23.7	23.5	72	39
1415	B.T.	2010-04-28	M	1958	52	35	42	1	38.9	0	7	25.6	21.5	81	20.9
1415	P.P.	2010-05-13	M	1950	59	41	45	1	48.9	1	7	19.7	19.7	79	23.5
1418	A.G.	2010-05-26	M	1959	51	31	40	1	40.3	0	5	20.3	18.9	80	20.2
1420	V.V.	2010-05-27	M	1951	58	28	43	1	28.6	0	4	23.6	19.3	79	11.3
1423	S.C.	2010-06-04	M	1977	33	32	43	1	69.9	1	14	24.8	25	55	75.9
1424	T.F.	1964-11-29	M	1964	45	38	45	0	23.8	0	6	13	12	88	25.8
1426	M.C.	2010-06-16	M	1963	47	30	45	0	49.5	1	11	17.6	16.7	78	20.2
1427	T.I.	2010-06-17	M	1970	40	42	49	1	30.3	1	8	16.9	18.3	76	29.8
1431	B.P.	2010-06-21	M	1961	49	44	46	1	94.1	1	22	21.3	21.4	53	84.8
1433	S.D.	2010-06-23	M	1958	51	32	46	1	85.4	1	15	23.3	23	81	49.7
1436	C.I.	2010-06-25	M	1957	53	39	47	1	14.4	0	11	19.2	16.5	80	12.2
1450	P.G.	2010-07-29	M	1944	66	31	46	0	47.4	0	12	22.5	19.5	72	38.3
1452	M.T.	2010-08-03	M	1952	57	36	47	0	35.5	1	17	18.3	17.2	79	72
1453	M.C.	2010-08-05	M	1951	59	29	45	1	63.3	1	16	20	19.6	77	30.1
1460	B.L.	2010-08-27	M	1980	29	28	42	0	75.5	1	14	24.9	25.7	84	36.4
1468	S.B.	2010-09-25	M	1964	46	38	45	1	40.3	1	13	21.3	18.1	83	7.8
1470	T.V.T.O.	2010-09-27	M	1977	33	35	47	0	93.3	0	12	25.4	25.8	61	64.4
1471	P.G.	2010-09-29	M	1956	54	39	54	0	75.9	1	12	31.3	32.1	56	61.8
1472	G.G.	2010-09-29	M	1981	29	21	37	0	5.7	0	3	20	11.8	92	1.1
1478	S.A.	2010-10-06	M	1981	29	31	44	0	15	1	9	20.2	15.8	86	6.7
1482	M.A.	2010-10-13	M	1950	60	37	46	1	31	1	12	20.2	15.9	90	19
1484	D.I.C.	2010-10-18	M	1974	35	31	47	1	91.2	1	15	20.9	21	80	62.6
1485	G.I.	2010-10-11	M	1940	70	39	46	1	75.3	1	15	24.6	25.1	80	64
1487	T.P.L.	2010-10-19	M	1959	51	31	43	1	57.8	1	12	24	20.8	76	29.7
1489	I.N.	2010-10-20	M	1957	53	34	46	1	60.4	1	16	31.6	34.7	74	63.2
1490	G.F.	2010-11-14	M	1952	58	32	48	1	45.9	0	8	17.8	17.4	66	52.7
1493	C.V.	2010-10-18	M	1961	48	28	43	1	20.2	1	15	23.3	19.6	88	7.1
1494	M.G.	2010-10-27	M	1949	61	32	45	1	72.5	1	10	32.7	34.4	59	74.3
1499	T.C.	2010-11-09	M	1944	66	25	40	1	22.8	1	3	21	20.4	88	3.5
1501	L.V.	2010-11-10	M	1957	53	22	36	0	25.3	0	9	20.7	19.2	78	60.6
1503	C.G.	2010-11-10	M	1949	61	38	42.5	1	55.3	1	14	17.6	15.6	84	10.1
1506	C.P.	2010-11-16	M	1968	42	35	43.5	0	77.3	1	23	33.2	33.1	62	74.2
1507	P.H.	2010-11-17	M	1951	59	41	55	1	61.9	1	16	39.7	40.9	61	72.2
1508	G.M.	2010-11-18	M	1967	43	26	41	1	7.3	0	6	20.2	17.2	90	1.7
1511	R.A.	2010-11-23	M	1980	30	25	40	0	15.3	0	6	17.7	0	83	3.5
1513	V.S.	2010-11-24	M	1961	49	32	41	0	18.1	1	2	23.7	19.9	81	5.4
1514	O.I.	2010-11-25	M	1944	66	29	45	0	40.8	0	9	33	39.7	70	16.4
1516	P.C.	2010-11-25	M	1940	70	27	43	1	54.1	0	9	30.8	32.7	83	45
1517	D.S.	2010-11-27	M	1955	55	23	40	0	17.4	0	3	19.2	18	90	1.3
1518	M.I.	2010-11-27	M	1968	42	35	43	0	44.5	1	8	20.9	15.3	81	16.1
1520	C.M.	2010-11-29	M	1941	68	26	42	1	30.6	1	14	19	17.6	90	7
1521	C.I.	2010-12-02	M	1949	60	37	45	1	51.5	1	5	20.3	20.3	72	30.1
1529	C.I.	2010-12-13	M	1966	44	37	46	1	45.4	1	14	32.7	33	70	43.2
1531	A.C.	2010-12-15	M	1964	46	35	45	1	23.7	1	9	22.1	18.1	35	49.9
1532	T.L.	2010-12-17	M	1930	80	33	43	1	33.6	1	15	23.1	22.6	86	24.3
1534	C.F.	2010-02-17	M	1964	46	28	43	1	24.3	0	1	20.8	16.1	83	8.4
1535	M.C.	2010-12-21	M	1935	75	35	50	1	41.3	1	16	21.8	20.5	77	63.4
1537	V.M.	2010-12-22	M	1943	67	34	51	1	61.3	1	8	25.1	25.5	80	57
1539	L.D.	2011-01-06	M	1973	37	36	43	0	61.2	1	17	20.7	20.8	62	74
1544	I.S.	2011-01-01	M	1969	41	35	47	1	26.1	1	11	21.7	16.1	75	17.1
1546	M.L.	2011-01-18	M	1966	44	50	46	0	52.2	1	18	17.9	18.5	56	18.6
1551	M.S.	2011-01-26	M	1947	63	32	45	1	41.4	0	8	20.7	19.6	88	12
1552	S.V.	2011-01-26	M	1960	51	42	46	1	68.4	1	18	22.8	22.7	73	48.1
1556	L.L.	2011-02-01	M	1980	30	27	41	0	5.5	0	2	15.6	16.9	81	11.2
1558	C.M.	2011-02-02	M	1945	65	32	43	1	55.8	1	14	19.6	20.6	77	44.8
1560	L.M.	2011-02-07	M	1951	59	42	45.5	0	88.6	1	12	26.1	26.1	72	61.9
1561	D.A.	2011-02-09	M	1969	42	36	45	1	43.1	1	17	21.4	18.9	58	30.3
1563	M.O.	2011-02-13	M	1964	46	31	47	1	33.6	1	12	26.7	14.4	92	12
1565	D.G.	2011-02-14	M	1958	52	26	41	0	13.5	1	14	19.3	15.7	89	5
1566	L.C.	2011-02-15	M	1957	53	35	45	1	37.4	0	4	20.2	17.9	86	59.6
1567	B.C.	2011-02-16	M	1966	44	41	52	1	74.1	1	13	22.7	22.1	74	53.9
1568	R.D.	2011-02-19	M	1949	61	29	45	1	8.2	0	11	21.9	14.5	93	6.4
1569	P.G.	2011-02-21	M	1956	55	28	44	1	33.4	0	13	25.3	23.4	86	0.7
1570	R.I.	2011-02-23	M	1965	45	24	38	1	23.9	1	6	18.6	17.3	78	8.3
1571	M.D.	2011-02-23	M	1970	40	44	48	0	62.1	1	9	27.6	28.7	81	40.1
1572	P.P.	2011-02-24	M	1947	63	40	50	1	69	1	23	28.4	29.7	61	67.9
1573	L.C.	2011-02-28	M	1936	74	27	41	1	36.1	1	6	19.9	21.1	87	6
1575	B.P.	2011-03-02	M	1962	49	29	45	1	9.5	0	2	19.9	14.5	94	2
1578	G.A.	2011-03-04	M	1977	33	35	46	0	45.3	1	16	17.9	16.5	90	53.5
1579	V.T.	2011-03-07	M	1949	61	29	41	1	20.5	0	7	21.2	18.6	95	7
1580	D.I.	2011-03-07	M	1948	62	42	45	1	80.1	1	12	26.3	27.3	67	71.6
1581	K.I.	2011-03-08	M	1938	72	21	38.5	0	19.3	0	4	17.2	16.2	86	8
1582	R.I.	2011-03-10	M	1939	71	33	48	0	24.7	1	15	15.1	14	80	23
1583	I.M.	2011-03-11	M	1959	51	42	48.5	1	69.4	1	21	26.2	28.3	79	51.1
1585	E.V.	2011-03-14	M	1949	62	40	56	1	26.6	0	7	18.9	19.5	73	38.9
1586	K.C.	2011-03-14	M	1979	31	43	52	1	83.1	1	22	28.2	28.5	42	86.5
1588	A.G.	2011-03-16	M	1957	54	50	51	1	18	1	8	21.8	17.2	75	57.7
1589	P.S.	2011-03-17	M	1955	55	39	50	1	18.9	1	5	20	18.5	80	0
1593	P.M.D.	2011-03-21	M	1953	57	38	46	1	43.6	1	13	19.8	19.8	79	39.1
1596	C.I.	2011-03-23	M	1950	60	35	47	0	50.2	1	11	23.7	24.4	64	43.4
1597	T.M.	2011-03-23	M	1945	65	47	50	1	32.9	1	11	20.3	17.3	82	12.1
1601	L.M.	2011-03-29	M	1963	47	35	47	1	60.7	1	19	40.1	40.8	74	58.9
1603	M.V.	2011-04-05	M	1950	60	40	51	1	62.3	1	15	21	20.8	68	43.7
1606	S.P.	2011-04-10	M	1954	56	40	47	1	57.7	1	15	22.7	21.1	68	42.6
1607	U.V.	2011-04-11	M	1940	71	35	47	1	36.6	0	10	19.1	20	82	12.8
1609	T.I.	2010-11-12	M	1959	51	40	45	0	18.5	0	12	19	11.9	84	4.3
1619	G.I.	2005-10-03	M	1955	49	45	48	1	79.4	1	18	21.6	25.2	49	61.1
1620	F.S.	2011-02-11	M	1947	64	32	45	0	48.8	0	12	17.7	17.2	79	32.7
1624	P.T.	2010-11-28	M	1963	47	31	45	0	23.8	0	7	16.1	14.1	78	30.8
1626	B.I.	2011-11-14	M	1948	63	40	55	1	9.3	1	8	15.8	15.3	82	3
1627	S.T.	2011-11-09	M	1954	57	39	48	1	45.2	1	16	19.5	17	84	42.5
1628	J.M.	2011-11-10	M	1959	51	36	45	1	50.8	1	7	20.8	17.8	85	23
1630	V.S.	2011-11-07	M	1968	42	45	47	0	74.8	1	15	23.3	23.6	82	65
1632	A.I.	2011-11-03	M	1947	64	44	45	1	48.5	0	6	21.3	18.6	92	32
1634	L.I.	2011-10-26	M	1956	55	40	49	1	42	1	16	22.8	23.1	73	32
1635	V.A.	2011-10-18	M	1956	55	42	48	1	44.8	0	2	26.7	24.2	96	32
1636	N.I.	2011-10-20	M	1943	68	34	47	1	66.1	1	14	22.7	23.3	86	42
1637	D.M.	2011-10-24	M	1968	43	30	45	1	67.5	1	12	35	33.6	78	35.7
1638	K.A.	2011-10-20	M	1954	57	26	42	1	39.9	1	14	22	16.3	83	10.8
1641	S.A.	2011-10-12	M	1959	52	31	46	1	64	0	12	21.5	21.5	83	56
1645	S.A.	2011-10-10	M	1980	31	26	41	0	17.3	1	4	25.9	23.3	90	4.4
1646	T.D.	2011-10-05	M	1948	63	31	43	1	30.5	0	8	21.8	19.3	86	16
1647	M.G.	2011-10-04	M	1955	56	37	45	1	67.4	1	13	24.3	22	67	51
1648	S.D.	2011-10-03	M	1939	72	31	41	1	12	0	3	21.9	14.9	78	95
1650	P.V.	2011-09-21	M	1968	43	35	47	1	80.3	1	15	20.6	19.8	91	60
1651	P.V.	21.09.2011	M	1989	22	25	39	0	4.7	0	6	16.7	14	91	3.2
1657	S.V.	2011-09-05	M	1967	43	31	45	0	37.4	1	15	23.6	20.4	88	35.3
1658	T.I.	2011-09-14	M	1977	34	30	42	0	10.4	0	5	17.5	15.1	58	2.1
1661	I.S.	2011-09-13	M	1988	23	21	30	0	2.7	1	12	14.9	12	94	3
1663	C.C.	2011-09-08	M	1962	49	41	47	0	83.1	1	19	27.4	27.4	75	76.9
1665	A.N.	2011-09-06	M	1961	50	28	45	0	41	0	6	17.6	16.9	80	14.8
1667	M.D.	2011-08-30	M	1961	49	31	43	0	42.9	1	5	24.1	18.5	85	10.2
1668	D.I.	2011-08-08	M	1950	60	26	39	0	20.4	1	8	19.3	17.4	81	16.7
1669	B.M.	2011-08-01	M	1947	64	35	48	1	25.3	1	10	26.3	26.7	91	11.5
1670	B.G.	2011-07-28	M	1951	60	30	42	1	23.8	1	14	22.3	22.7	85	11.4
1672	S.G.	2011-07-25	M	1942	69	33	52	1	37	1	14	21.5	20.7	83	37.3
1673	S.F.	2011-07-15	M	1976	35	29	44	0	11.7	1	4	23.7	16.6	81	1.3
1674	C.G.	2011-07-18	M	1962	48	32	43	0	39	1	13	22.1	19.6	64	28.4
1675	M.S.	2011-05-25	M	1946	65	28	40	1	41.8	1	10	20.8	20.9	90	29.3
1675	L.M.	2011-07-11	M	1953	57	47	55	1	32.8	1	12	18.3	17.9	78	26
1676	P.V.	2011-05-23	M	1938	73	29	46	1	47.3	0	12	23.3	22.8	87	31
1678	T.G.	2011-05-17	M	1966	44	33	46	0	76	1	18	35.5	23.2	61	20.8
1680	D.I.	2011-06-30	M	1956	55	28	40	0	15.4	1	9	16.9	15.3	96	4
1680	P.V.M.	2011-05-30	M	1953	58	40	50	1	28.1	1	2	17.6	18	80	24.2
1682	A.I.	2011-05-12	M	1947	64	30	47	1	44	0	8	29.6	31.9	72	45.1
1684	L.A.	2011-06-27	M	1984	27	28	41	1	4.9	1	8	17.4	12.4	94	1
1684	M.I.	2011-05-05	M	1966	45	33	43	0	80.3	1	13	21	20.4	70	34
1685	N.N.	2011-05-04	M	1953	58	40	48	1	79.3	1	11	18.1	18.2	66	77.1
1686	M.P.	2011-05-03	M	1953	58	37	47	1	5.2	0	16	14.6	17	92	2
1688	B.C.	2011-04-28	M	1951	59	26	43	1	43.5	1	15	22.7	21.4	80	23
1689	T.C.	2011-04-28	M	1985	25	31	41	0	15.9	0	9	17.3	11.1	86	7
1690	M.M.	2011-08-01	M	1954	57	42	50	1	82	1	18	22.1	22.2	79	54
1691	S.P.	2011-04-05	M	1936	74	35	51	1	81.2	1	19	20.5	21.2	80	56.3
1692	D.N.	2011-04-23	M	1963	47	27	41	0	21	1	12	20.2	18.9	78	7
1693	G.G.	2011-04-20	M	1957	54	26	45	1	53.4	1	8	21.5	21.8	72	32
1693	D.T.	2011-06-13	M	1950	60	26	45	0	27.4	0	8	20.1	21.5	94	13
1695	B.M.	2011-04-20	M	1964	46	35	43	0	4.5	0	14	16.5	0	4	2
1696	G.C.	2011-04-15	M	1946	64	36	45	1	34.7	0	7	25	18.6	87	1.1
1697	D.V.	2011-03-10	M	1981	30	26	42	0	15.4	0	3	20.8	15.7	83	1.9
1697	D.I.	2011-05-21	M	1934	77	29	46	0	39.2	0	2	18.5	17.2	80	23.4
1699	L.A.	2011-05-27	M	1968	43	34	45	0	47	0	5	18.3	15	65	28.5
1700	P.P.	2012-03-29	M	1943	69	25	47	1	7.8	0	4	22.4	17.9	92	3.4
1702	C.I.	2012-03-26	M	1934	77	26	39	0	24	1	9	18.9	15.1	82	6.8
1703	C.I.	2012-03-23	M	1959	52	29	42	1	83.3	1	15	27.4	27.8	62	79.7
1705	D.I.	2012-03-21	M	1957	55	27	42	1	23.4	1	14	32.3	31.1	86	15
1709	G.C.	2012-03-13	M	1948	63	26	39	1	51.4	1	10	20	17.7	91	21.8
1711	F.G.	2012-03-09	M	1977	34	35	43	1	78.6	1	16	33.1	32.9	91	42.9
1712	C.I.	2012-03-09	M	1957	54	35	47	1	63.2	1	17	25.8	24.6	79	16
1713	G.D.	2012-03-07	M	1965	47	26	40	1	68.8	0	2	35.4	34.7	74	30.3
1715	P.I	2012-03-05	M	1957	54	41	50	1	50.3	0	12	18.4	18.8	83	32
1717	B.N.	2012-03-06	M	1985	26	19	36	1	9.9	1	14	18.2	14.5	86	3.6
1719	M.I.	2012-02-22	M	1952	59	38	49	1	33.2	1	7	18.9	17.8	79	11
1720	G.P.	2012-02-23	M	1952	59	36	39	1	31.5	0	11	21	18.6	87	16.3
1721	P.O.	2012-02-21	M	1969	42	31	39	0	7.9	0	8	22.2	15.2	91	3
1722	H.N.	2012-02-21	M	1979	32	31	46	1	16	0	7	22.2	16.3	91	4.4
1723	G.I.	15fe12	M	1957	54	38	56	1	41.7	1	12	22	20	81	75.9
1725	R.S.	2012-02-13	M	1990	21	19	34	0	7.7	0	8	18.8	14.8	77	15.8
1727	P.D.	2012-02-08	M	1973	38	38	48	1	38.9	0	12	22.2	18.3	62	47.6
1728	C.C.	2012-02-06	M	1948	64	38	54	1	36.9	1	15	21.1	19.1	80	23
1729	V.N.	2012-02-06	M	1981	30	25	46	0	11.6	0	11	21.4	15	70	18.6
1730	S.I.	2012-02-01	M	1956	55	30	45	0	65.3	0	20	35.5	36.5	87	45
1734	M.I	2012-01-25	M	1952	59	42	48	1	61.4	0	2	22.1	20.6	84	45
1735	C.V.	2012-01-24	M	1965	46	27	36	1	56.1	0	3	18.2	15.9	74	45
1736	I.C.	2012-01-23	M	1983	28	41	47	0	114.3	1	19	16.3	15.7	78	61.9
1737	S.M.	2012-01-20	M	1952	59	31	45	1	63	1	14	21.8	20.6	74	45
1738	J. P	2012-01-20	M	1955	56	38	45	1	18	1	4	19.3	12.6	91	9
1741	T.U.	2012-01-11	M	1968	43	57	55	1	35.7	0	9	20.4	13.4	73	100
1744	F.O.	2012-01-06	M	1982	29	31	43	0	27.4	0	8	22.2	19.4	90	3.7
1745	I.I.	16dec012	M	1966	45	60	49	1	108.2	1	11	18.4	19	54	79
1747	R.M.	2011-12-21	M	1959	52	28	42	1	17.1	1	12	24.1	21.1	94	7
1749	P.L.	2011-12-14	M	1969	42	46	44	1	63.2	1	4	21.5	17.6	82	0
1751	M.E.	2011-12-08	M	1954	57	35	49	1	40.3	0	6	17.8	17.2	86	42.7
1752	N.I.	2011-12-07	M	1953	58	26	41	1	16.8	1	16	21.2	16.9	80	2
1761	G.L.	2011-11-21	M	1971	40	41	50	1	81	1	16	25.3	24.9	84	80
1764	T.I.	2011-11-16	M	1946	65	25	41	1	27	1	10	23	18.4	85	3.9
1765	U.C.	2011-11-14	M	1958	53	38	50	1	51.6	0	12	22.8	14.7	84	35
1766	G.S.	2012-08-10	M	1974	38	29	41	0	40.5	1	12	20.7	19.1	83	24.4
1767	D.M.	2012-08-08	M	1978	34	30	43	0	52.1	1	10	24.3	22.7	86	19.6
1768	M.A.	2012-02-08	M	1957	55	38	42	0	95.9	1	9	17.5	15.6	81	67
1770	A.N.	2012-07-26	M	1951	61	29	47	1	32.2	1	15	24	23.6	83	19
1771	R.G.	2012-07-02	M	1977	35	32	40	0	12.7	1	12	20.5	0	92	14.5
1772	F.N.	2012-08-02	M	1956	55	22	38	1	26.9	1	12	21	20.7	94	2.7
1774	C.G.	2012-03-18	M	1959	53	37	46	1	81.5	1	16	29.6	30.5	62	68.7
1777	S.P.	2012-07-24	M	1949	63	33	39	0	27.9	1	3	18.6	18.1	86	18
1779	B.T.	2010-10-01	M	1958	52	25	39	0	30	0	2	25.8	25.9	77	8.4
1780	M.A.	2012-07-18	M	1968	44	21	30	0	3.7	1	9	16.1	15.5	86	3.1
1781	I.B.	2012-07-16	M	1989	23	32	42	0	49.1	0	3	19.3	17.2	92	5.2
1784	A.C.	2012-06-11	M	1955	56	34	50	1	32.3	1	15	18.9	17.5	89	7.1
1786	C.R.	2012-07-09	M	1964	47	27	42	0	28.7	1	9	25.5	22	75	10.1
1788	B.I.	2012-05-10	M	1937	74	25	38	0	13.2	0	9	24.7	24.4	81	3.2
1788	L.M.	2012-07-28	M	1950	61	34	43	1	15.2	1	14	20.4	14.4	82	0
1789	C.G.	2012-07-02	M	1961	50	36	42	1	12.3	0	11	17.1	16.3	89	12.9
1790	S.C	2012-06-14	M	1961	50	43	44	1	74	1	9	19.1	18.4	83	53.4
1791	M.I.	2012-06-08	M	1986	25	39	47	0	35.5	0	7	20.3	13.4	81	25
1791	S.I.	2012-07-04	M	1965	47	33	48	1	54.2	0	3	34.7	35.1	72	25.4
1792	O.F.	2012-06-25	M	1983	29	28	41	0	17.5	1	4	22.1	20.3	82	4.8
1793	K.I.	2012-06-27	M	1980	32	27	40	0	7.4	1	8	22.3	16.8	90	3.8
1793	L.C.	2012-05-30	M	1947	64	30	48	1	27.3	0	5	21.9	20.3	80	23
1794	L.G.	2012-05-09	M	1947	64	23	34	1	35.7	0	3	17	17.1	88	7.3
1796	Z.I.	2012-06-01	M	1954	57	26	40	1	31.8	0	15	22.2	15.3	84	31.1
1796	S.A.	2012-06-19	M	1977	35	36	48	0	63.3	0	2	22.5	21	79	70.9
1797	S.M.	2012-05-25	M	1971	40	29	41	0	29.4	0	10	33.5	33	78	27.8
1797	C.L.	2012-06-20	M	1958	53	28	43	1	17.2	1	9	18.3	12.9	95	4
1798	L.A.	2012-05-22	M	1975	37	36	44	0	95.3	1	15	22.2	21.8	92	0
1799	C.I.	2012-05-23	M	1950	62	28	44	1	7.8	0	4	17.8	12.9	94	9.2
1799	K.P.	2012-06-15	M	1967	45	30	46	0	88.1	1	4	22	22.1	83	62.5
1800	S.P.	2012-06-15	M	1950	61	48	48	1	47.8	1	9	25.9	22.5	70	43
1802	B.M.	2012-05-24	M	1984	27	19	33	0	3.4	0	1	23.6	17.6	94	3.4
1803	C.V.	2012-05-17	M	1967	44	38	46	0	38.8	1	8	16.3	16.3	78	26.8
1806	S.P.	2012-05-01	M	1975	36	44	45	0	86.4	0	3	21.2	19.5	71	84.6
1808	J.E.	2012-05-14	M	1960	51	38	47	1	49.6	1	15	32.5	30.5	70	45.1
1811	B.I.	2012-05-08	M	1952	59	32	43	1	34	1	9	21.8	20.8	83	35.7
1812	M.V.	2012-05-03	M	1947	64	26	39	1	37.5	1	10	21.2	21.4	86	6
1816	B.R.	2012-04-24	M	1949	62	31	54	1	13.1	0	3	16.5	13.6	80	28.2
1817	G.I.	2012-04-26	M	1955	56	38	51	1	41.2	0	2	20.1	19.8	88	0
1818	M.C.	2012-04-19	M	1947	65	28	42	1	7.5	0	0	17.1	16.3	92	5.4
1823	R.P.	2012-03-28	M	1954	57	35	45	1	25.9	1	12	18.5	12	57	64
1824	R.C.	2012-03-22	M	1951	61	29	43	0	42.9	1	12	22.8	22.2	88	7.9
1825	G.A.	2012-03-12	M	1980	31	26	37	0	27.8	0	2	18.8	18.4	86	1.5
1830	H.D.	2012-04-10	M	1940	71	28	47	0	19.9	0	14	17.8	18	80	12
1831	S.C.	2012-04-09	M	1946	66	24	36	0	19.5	0	1	23.9	21.7	86	12
1833	C.N.	2012-04-05	M	1975	36	31	42	0	72.2	1	7	32	31.4	82	68.2
1834	B.I.	2012-04-05	M	1940	71	28	39	0	13.6	0	1	18	14.9	86	6.8
1835	L.M.	2012-04-02	M	1954	57	33	42	0	40.5	1	6	25.5	23.9	78	27
1837	M.I.	2012-03-30	M	1954	57	35	45	1	42.5	1	14	22.6	18.1	79	40
1838	C.M.	2012-08-10	M	1975	37	30	44	0	26.6	1	9	16.4	14.5	95	18
1842	A.R.	2012-07-11	M	1954	58	28	37	0	1.5	1	9	14.2	12.4	94	0
1844	B.D.	2012-08-15	M	1969	42	28	43	1	33.4	1	15	23.2	15.3	86	21
1846	V.F.	2012-08-17	M	1958	54	24	39	0	36.7	0	7	29.2	27.3	87	5.8
1848	S.C.	2012-08-21	M	1992	19	21	37	0	8.8	0	0	17.3	16.4	61	2.6
1849	H.M.	2012-08-23	M	1958	54	40	50	1	72.6	0	18	23.9	24	79	52.4
1852	M.M.	2012-09-17	M	1974	37	44	49	0	68.1	1	8	29	28.6	69	83.3
1853	D.I.	2012-09-19	M	1954	58	32	44	0	69.3	1	12	30.4	30	69	62.1
1854	W.W.	2012-09-01	M	1959	53	25	38	1	6.3	1	9	19.6	12.8	87	1.8
1857	G.C.	2012-09-11	M	1949	62	35	55	1	88	1	22	25.5	27	73	57.9
1859	B.C.	2012-08-27	M	1956	56	45	38	1	12.8	1	17	20.1	18.5	88	1
1860	T.S.	2012-08-23	M	1978	33	33	54	0	42.4	1	12	19.2	19.4	83	43.2
1861	R.T.	2012-09-20	M	1946	66	23	37	0	54.3	0	15	25.1	25.2	86	15.5
1866	M.I.	2012-09-26	M	1940	72	33	36	1	2.6	0	0	16.4	11.6	86	1.5
1867	B.I.	2012-08-14	M	1968	43	57	45	0	70.5	0	6	15.1	13	88	72
1869	B.I.	2012-10-03	M	1948	64	35	40	1	51.4	1	14	22.7	22.3	75	53
1871	G.A.	2012-10-10	M	1948	64	28	43	1	18.1	0	6	20.2	17.9	85	3.1
1872	I.S.	2012-10-20	M	1957	55	29	42	1	48.5	1	3	19.1	17.8	79	22.4
1878	C.G.	2012-10-19	M	1962	50	42	58	0	53.8	1	10	26.7	27.1	63	52.2
1880	C.I.	2012-11-07	M	1965	47	41	47	1	34.4	0	6	27	21.2	75	31.8
1882	B.N.	2012-11-07	M	1943	69	34	45	0	54.3	0	15	22.6	22.4	62	48
1883	C.C.	2012-11-14	M	1969	43	30	42	1	36.8	1	19	19.3	16.5	83	18.8
1887	L.N.	2012-11-05	M	1967	45	28	40	1	17.1	1	9	18	19.5	89	4.2
1889	V.I.	2012-11-01	M	1933	78	39	47	1	44.5	1	3	17.7	13.9	83	27.1
1892	B.M.	2012-10-30	M	1959	53	38	47	0	71.3	1	21	35.2	35.2	56	67.9
1898	B.V.C.	2012-11-23	M	1965	47	43	45	1	101.6	1	15	23.3	23.2	72	68.3
1900	B.L.	2012-11-26	M	1945	67	32	45	1	41.6	1	9	20.6	14.9	89	6.2
1902	M.V.	2012-11-19	M	1942	70	33	50	1	24.1	1	13	20.5	17.7	85	12
1903	J.D.	2012-11-14	M	1953	59	29	43	1	33	1	16	17.1	16.3	70	45.1
1906	P.I.	2012-12-03	M	1960	52	36	45	1	63.6	1	16	36.1	37.2	42	51.8
1907	R.E.	2012-12-04	M	1939	73	35	45	1	81.3	1	21	24.2	24.7	58	56.3
1908	G.G.	2012-12-05	M	1961	51	28	44	0	71.9	1	6	31.1	31.1	68	42.5
1909	P.L.	2012-12-08	M	1984	28	38	41	0	11.1	1	14	18.6	18.5	88	1.8
1910	M.D.	2012-12-07	M	1954	58	36	49	1	66.7	1	9	22.1	21.7	64	92.3
1912	G.I.	2012-12-11	M	1969	43	42	49	0	106.5	1	14	23.9	24.3	60	100.3
1913	D.S.	2012-11-29	M	1967	45	29	46	0	65.2	0	10	28.4	31	65	35
1914	S.F.	2012-12-17	M	1941	71	29	39	1	29.6	1	14	15.1	13.6	85	10.8
1916	I.S.	2012-12-19	M	1975	37	38	51	0	43.5	0	10	15.2	15.2	77	15.7
1917	N.A.	2012-12-20	M	1944	68	28	41	1	46	0	10	19	18.3	80	16.7
1918	D.S.	2012-12-22	M	1953	59	38	49	1	77.6	1	15	16.8	16.8	67	68.6
1919	S.M.	2013-01-07	M	1963	49	35	45	1	66.3	1	18	36.8	37.4	62	59.1
1921	M.G.	2013-01-12	M	1955	57	27	42	1	38.8	0	12	19.2	18.1	90	21
1922	B.T.	2013-01-14	M	1948	65	26	44	1	51.4	0	3	17.7	17.9	84	15.4
1923	T.D.	2013-01-15	M	1966	46	34	44	0	36.7	1	10	21.8	21.1	76	31
1924	A.A.	2013-01-10	M	1957	55	33	45	1	86.7	1	14	17.2	16.2	63	76.3
1926	S.I.	2013-01-18	M	1981	31	36	47	1	16.3	1	4	22.2	16.6	90	3.5
1929	M.I.	2013-01-11	M	1971	41	31	45	0	32.5	0	10	19.9	15.2	79	2.4
1930	S.I.	2013-01-26	M	1968	44	44	56	1	61.2	1	11	19.8	20	39	67.2
1931	T.T.	2013-01-28	M	1985	27	24	37	0	6.5	0	8	17.6	14.7	82	1
1932	L.I.	2013-01-28	M	1939	73	28	43	1	35.7	0	13	18.9	18.6	82	27
1933	A.A.	2013-01-25	M	1953	59	42	54	1	90.5	0	10	17.6	17	44	65.4
1934	P.N.	2013-01-30	M	1971	41	25	38	1	41.1	1	12	18.9	16.7	87	4.7
1935	G.I.	2013-02-01	M	1961	51	24	36	0	10.3	0	10	20.9	15.9	92	1
1942	G.I.	2013-02-11	M	1952	60	28	39	1	31.4	1	13	22.4	18.1	82	11.1
1944	G.C.	2013-02-13	M	1968	44	28	41	0	38.7	0	13	23.5	23.9	76	28.9
1945	R.R.	2013-02-15	M	1987	25	33	43	0	38.8	1	15	23.1	19.6	90	14.2
1946	B.M.	2013-02-16	M	1968	44	32	45	1	66.7	0	14	23.7	22.5	71	53.7
1947	C.D.	2013-01-23	M	1967	45	46	50	1	46.3	0	12	16.2	17.4	87	29.7
1948	B.C.	2013-03-18	M	1960	52	25	42	0	37.1	0	4	19.7	15.4	79	18
1951	S.N.	2013-01-22	M	1969	43	29	39	1	35.2	1	4	18.7	15.9	92	1.5
1952	G.P.	2013-02-20	M	1967	45	34	45	0	24	0	8	21.8	19.6	88	3.9
1953	S.V.	2013-02-20	M	1983	29	29	44	1	46.4	0	10	21.5	17.9	87	6.7
1954	S.E.	2013-02-22	M	1956	56	38	48	1	81.1	1	15	23	23.1	78	69.7
1955	M.G.	2013-02-25	M	1957	55	45	48	1	87.5	1	14	19.7	19.7	70	51.1
1956	A.G.	2013-02-26	M	1951	61	31	45	0	55.3	1	9	18.6	16	88	7
1957	C.A.	2013-02-22	M	1981	31	26	43	0	47.9	0	6	22.8	22.3	87	15.4
1958	N.I.	2013-02-27	M	1942	70	42	48	1	36.5	1	8	19.6	19.2	76	21.9
1960	M.O.	2013-03-04	M	1962	50	41	46	1	49.9	1	14	16.8	15.2	66	35.3
1961	I.L.	2013-03-07	M	1977	35	32	41	1	74.6	0	1	28.6	28.9	58	73.3
1963	P.I.	2013-03-08	M	1955	57	38	52	1	84.1	1	24	19.1	19.1	52	76.1
1964	N.I.	2013-03-06	M	1951	61	31	43	1	51.4	1	14	21.3	18.5	78	20.6
1965	S.M.	2013-03-16	M	1974	38	25	37	0	19.8	0	5	24.7	18.6	84	7.4
1967	K.F.	2013-03-18	M	1961	51	52	62	1	40.8	1	9	19.3	16.8	75	22.7
1971	Z.S.	2013-03-22	M	1965	47	30	40	0	48.8	0	12	21.6	18	77	21.6
1978	V.I.	2013-03-25	M	1962	50	32	43	1	65.1	1	10	39.3	39.7	82	59
1980	Z.I.	2013-04-01	M	1951	62	39	48	0	56.4	1	16	25.1	25.6	68	40.3
1981	P.C.	2013-04-02	M	1940	73	38	52	1	77	1	12	19.3	16.7	71	61
1983	B.G.	2013-03-27	M	1952	61	42	45	0	36.1	1	23	19.3	15	76	12
1986	M.S.	2013-04-05	M	1964	48	44	48	0	29.3	0	5	21.3	13.3	87	8.9
1987	R.N.	2013-04-06	M	1951	61	33	54	1	75.6	1	10	24.1	24.8	74	44.2
1988	Z.D.	2013-04-08	M	1956	56	41	60	1	74.4	1	20	23.4	22.4	67	63.9
1989	L.S.	2013-04-08	M	1965	47	33	42	0	83.8	0	3	20.5	20	75	64.6
1991	C.T.	2013-04-10	M	1957	55	50	32	1	85.7	1	20	18.7	17.7	70	62.4
1992	B.M.	2013-04-12	M	1965	47	41	55	1	73.9	1	20	33.1	33.3	69	67
1993	M.E.	2013-04-15	M	1968	45	30	41	0	41.5	1	13	20.8	18.6	90	16.2

## Sheet: Database D3
ID	Name initials	Date	Sex	Birthyear	Age	BMI	Neck circumference (cm)	Epworth SS	AHI	Sleepiness
124	U.P.	2005-10-20	M	1965	40	42	39	6	3.6	0
127	B.S.	2005-10-19	M	1975	29	45	52	4	3.9	0
137	S.A.	2006-01-18	M	1960	45	28	46	8	6.9	0
161	E.I.	2005-09-27	M	1956	49	32	41	3	6.7	0
171	T.P.	2005-09-07	M	1982	22	20	34	6	5.3	0
194	S.D.	2006-04-12	M	2000	6	21	31	0	3.4	0
200	C.I.	2006-04-05	M	1950	55	31	42	8	7.1	0
204	L.I.	2006-05-23	M	1946	60	39	51	23	6.1	1
234	Z.I.	2006-03-01	M	1964	41	35	45	20	4.2	1
279	H.R.	2006-06-29	M	1968	38	33	41	9	1.2	0
308	B.I.	2006-11-08	M	1948	58	39	53	8	4.7	0
326	S.C.	2006-11-22	M	1989	17	17	33	15	4.7	1
354	D.F.	2005-06-27	M	1936	69	36	45	7	8.4	0
361	B.S.	2005-07-14	M	1953	52	27	47	12	0.9	1
376	T.I.	2005-10-05	M	1952	53	30	42	1	1.9	0
445	D.F.	2007-02-19	M	1967	39	32	41	2	1.1	0
464	T.N.	2007-03-27	M	1947	59	26	39	1	7.3	1
466	N.G.	2007-03-29	M	1957	49	32	46	4	6.7	1
502	G.V.	2007-09-25	M	1987	20	21	38	2	4.8	0
638	A.I.	2007-12-12	M	1951	56	32	46	12	1.9	1
642	L.G.	2007-12-04	M	1949	58	30	45	3	9.5	0
649	R.A.	2007-11-26	M	1978	29	27	39	2	7.4	0
653	S.F.	2007-11-22	M	1975	32	32	48	10	9.7	1
708	R.M.	2008-03-10	M	1942	65	23	39	3	7.5	0
744	P.C.	2008-04-06	M	1947	60	24	43	2	9.6	0
884	C.S.	2008-08-04	M	1972	36	21	34	8	9.2	0
1039	P.P.	2009-01-14	M	1952	56	28	43	5	7.8	0
1067	S.L.	2009-02-11	M	1953	55	21	39	2	9.8	0
1084	D.D.	2009-02-20	M	1971	37	25	41	1	7.1	0
1110	V.N	2009-03-31	M	1930	78	28	41	1	2.8	0
1125	K.I.	2009-04-27	M	1931	77	26	40	2	9	1
1190	F.V.	2009-07-20	M	1998	11	22	31	10	6.1	1
1243	T.D.	2009-08-25	M	1960	49	29	45	8	3.7	0
1291	H.V.	2009-10-22	M	1958	51	34	45	2	7.2	1
1320	D.I.	2009-12-10	M	1952	57	33	43	8	5.8	0
1362	C.C.	2010-02-10	M	1956	54	30	43	1	4.8	1
1441	M.A.	2010-07-14	M	1993	16	29	39	8	6.3	0
1472	G.G.	2010-09-29	M	1981	29	21	37	3	5.7	0
1508	G.M.	2010-11-18	M	1967	43	26	41	6	7.3	0
1542	N.R.	2011-01-12	M	2003	7	23	34	1	7	0
1556	L.L.	2011-02-01	M	1980	30	27	41	2	5.5	0
1568	R.D.	2011-02-19	M	1949	61	29	45	11	8.2	0
1575	B.P.	2011-03-02	M	1962	49	29	41	2	9.5	0
1591	T.AM.	2011-03-19	M	2000	10	26	30	5	7.3	0
1626	B.I.	2011-11-14	M	1948	63	40	55	8	9.3	1
1651	P.V.	2011-09-21	M	1989	22	25	39	6	4.7	0
1661	I.S.	2011-09-13	M	1988	23	21	30	12	2.7	1
1684	L.A.	2011-06-27	M	1984	27	28	41	8	4.9	1
1686	M.P.	2011-05-03	M	1953	58	37	47	16	5.2	1
1695	B.M.	2011-04-20	M	1964	46	35	43	14	4.5	0
1700	P.P.	2012-03-29	M	1943	69	25	47	4	7.8	0
1717	B.N.	2012-03-06	M	1985	26	19	36	14	9.9	1
1721	P.O.	2012-02-21	M	1969	42	31	39	3	7.9	0
1725	R.S.	2012-02-13	M	1990	21	19	34	8	7.7	0
1780	M.A.	2012-07-18	M	1968	44	21	30	9	3.7	1
1793	K.I.	2012-06-27	M	1980	32	27	40	8	7.4	1
1799	C.I.	2012-05-23	M	1950	62	28	44	4	7.8	0
1802	B.M.	2012-05-24	M	1984	27	19	33	1	3.4	0
1818	M.C.	2012-04-19	M	1947	65	28	42	0	7.5	0
1842	A.R.	2012-07-11	M	1954	58	28	37	9	1.5	1
1848	S.C.	2012-08-21	M	1992	19	21	37	0	8.8	0
1854	W.W.	2012-09-01	M	1959	53	25	38	9	6.3	1
1866	M.I.	2012-09-26	M	1940	72	33	36	0	2.6	0
1894	B.I.	2012-11-12	M	2003	8	13	41	0	5.7	0
1931	T.T.	2013-01-28	M	1985	27	24	37	0	6.5	0
